# Supplementary material for: Finite element simulations for investigating the strength characteristics of a 5 m composite wind turbine blade
Source: Copernicus journal article supplement (doi:10.5194/wes-5-1339-2020), 2020-10-20
Supplement: Supplementary file 1 [file CAD_Blade_Span and Twist.xlsx]

## Sheet: Sheet1
Span m	Twist °
0.01	25.1
0.1	25.1
0.2	23.2
0.3	22
0.4	21.2
0.5	20.6
0.6	19.9
0.7	19
0.8	17.9
0.9	16.6
1	15.4
1.1	14.3
1.2	13.3
1.3	12.4
1.4	11.4
1.5	10.7
1.6	10.2
1.7	9.7
1.8	9.2
1.9	8.8
2	8.3
2.1	7.8
2.2	7.3
2.3	6.8
2.4	6.2
2.5	5.7
2.6	5.2
2.7	4.7
2.8	4.4
2.9	4.2
3	3.8
3.1	3.6
3.2	3.4
3.3	3.1
3.4	2.9
3.5	2.7
3.6	2.5
3.7	2.3
3.8	2.1
3.9	1.9
4	1.7
4.1	1.5
4.2	1.4
4.3	1.2
4.4	1.1
4.5	0.9
4.55	0.9
4.6	0.8
4.65	0.7
4.7	0.7
4.75	0.6
4.8	0.6
4.85	0.5
4.9	0.4
4.95	0.3
5	0.1
