# Supplementary material for: Finite element simulations for investigating the strength characteristics of a 5 m composite wind turbine blade
Source: Copernicus journal article supplement (doi:10.5194/wes-5-1339-2020), 2020-10-20
Supplement: Supplementary file 2 [file METU_B_C_layers_04-05-06.pdf › RUZGEM_Blade_Geometry_and_Layup/Chassis/METU_B_C_layers_04-05-06.pdf]

| RevNo | Revision note | Date | Signature | Checked |
|-------|---------------|------|-----------|---------|
|-------|---------------|------|-----------|---------|

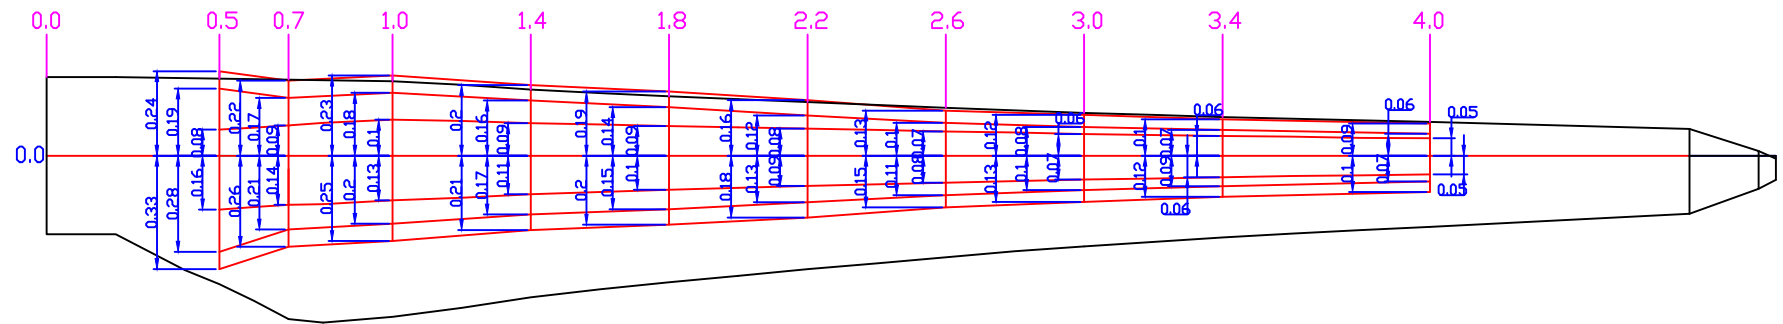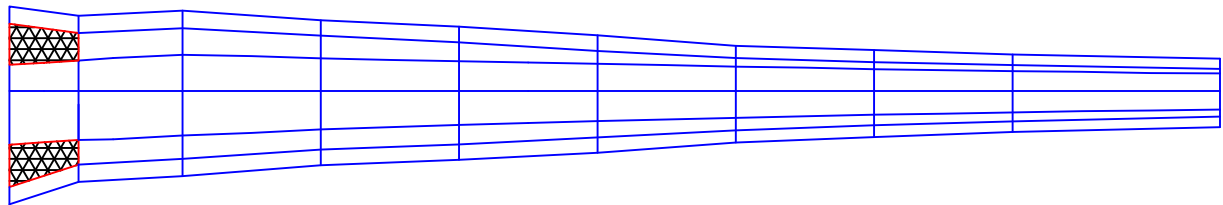

4.Triaxial ( $\pm 45/0$ ) E-Glass fabric: METYX XL800E10F-0/45 of 835g/m<sup>2</sup>  
Epoxy Resin: HUNSTMAN Araldite LY 3505/Hardener XB 3403  
Surface le area = 0,0198 m<sup>2</sup> - Surface te area = 0,0194 m<sup>2</sup>

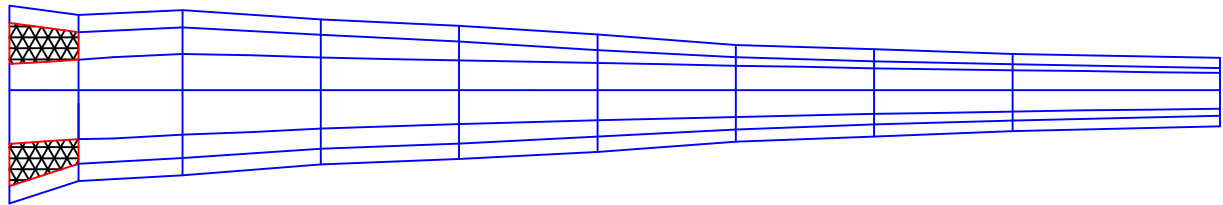

5.Triaxial ( $\pm 45/0$ ) E-Glass fabric: METYX XL800E10F-0/45 of 835g/m<sup>2</sup>  
Epoxy Resin: HUNSTMAN Araldite LY 3505/Hardener XB 3403  
Surface le area = 0,0198 m<sup>2</sup> - Surface te area = 0,0194 m<sup>2</sup>

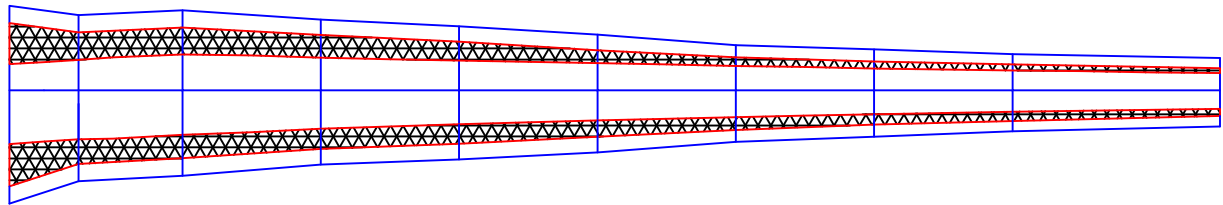

6.Triaxial ( $\pm 45/0$ ) E-Glass fabric: METYX XL800E10F-0/45 of 835g/m<sup>2</sup>  
Epoxy Resin: HUNSTMAN Araldite LY 3505/Hardener XB 3403  
Surface le area = 0,1517 m<sup>2</sup> - Surface te area = 0,1636 m<sup>2</sup>

The pictures show the blade in flattened state  
Fabrication method : Wet hand Lay-up  
Mean Wf (fiber weight fraction) = 0.55

| Itemref                   | Quantity                 | Title/Name, designation, material, dimension etc |                                                |                  | Article No./Reference |  |
|---------------------------|--------------------------|--------------------------------------------------|------------------------------------------------|------------------|-----------------------|--|
| Designed by<br>CompBlades | Checked by<br>CompBlades | Approved by - date<br>CompBlades - 20/09/13      | File name                                      | Date<br>20/09/13 | Scale<br>1:20         |  |
| CompBlades.com            |                          |                                                  | Blade Chassis - Lamination plan - Layers 4/5/6 |                  |                       |  |
|                           |                          |                                                  | METU_B_C_layers_040506                         | Edition<br>0     | Sheet<br>1/1          |  |
