# Supplementary material for: Finite element simulations for investigating the strength characteristics of a 5 m composite wind turbine blade
Source: Copernicus journal article supplement (doi:10.5194/wes-5-1339-2020), 2020-10-20
Supplement: Supplementary file 3 [file METU_B_C_layers_07-08-09.pdf › RUZGEM_Blade_Geometry_and_Layup/Chassis/METU_B_C_layers_07-08-09.pdf]

|       |               |      |           |         |
|-------|---------------|------|-----------|---------|
| RevNo | Revision note | Date | Signature | Checked |
|-------|---------------|------|-----------|---------|

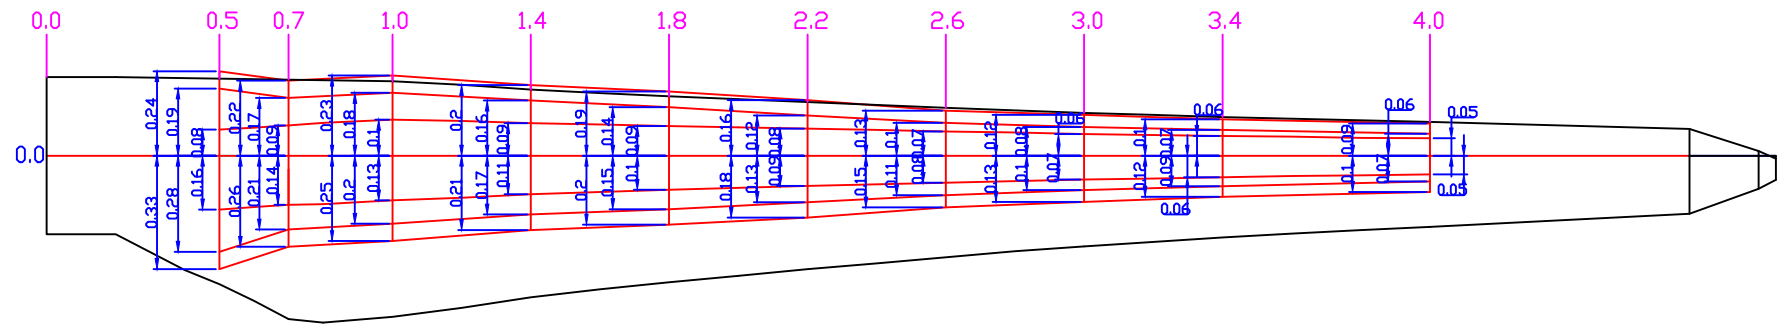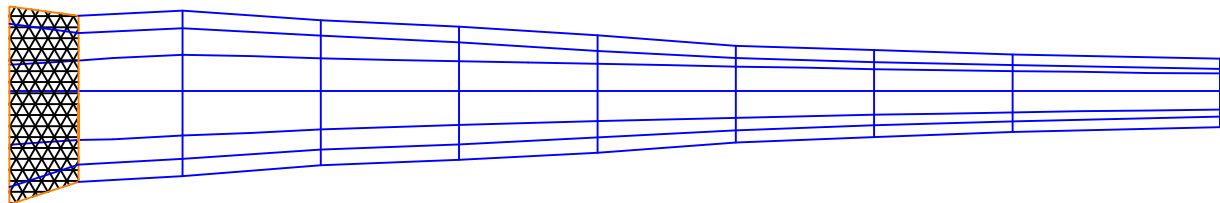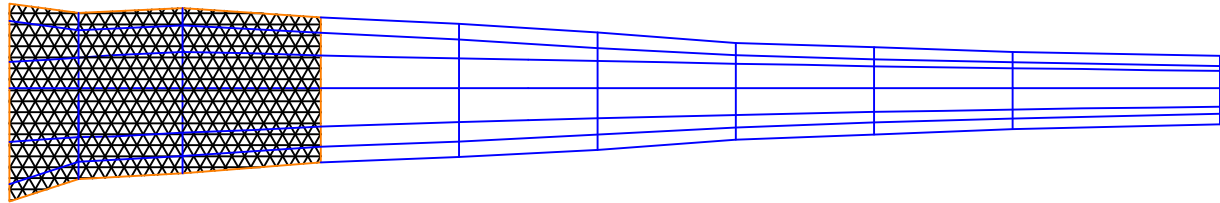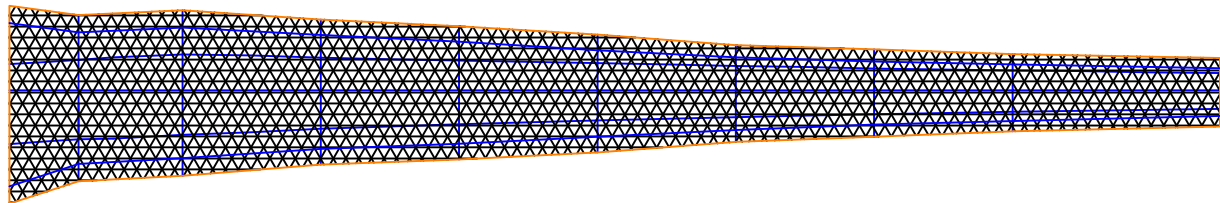

The pictures show the blade in flattened state  
Fabrication method : Wet hand Lay-up  
Mean Wf (fiber weight fraction) = 0.55

|                           |          |                                                  |                                                |           |                       |               |
|---------------------------|----------|--------------------------------------------------|------------------------------------------------|-----------|-----------------------|---------------|
| Itemref                   | Quantity | Title/Name, designation, material, dimension etc |                                                |           | Article No./Reference |               |
| Designed by<br>CompBlades |          | Checked by<br>CompBlades                         | Approved by – date<br>CompBlades – 20/09/13    | File name | Date<br>20/09/13      | Scale<br>1:20 |
| CompBlades.com            |          |                                                  | Blade Chassis – Lamination plan – Layers 7/8/9 |           |                       |               |
|                           |          |                                                  | METU__B__C__layers__070809                     |           | Edition<br>0          | Sheet<br>1/1  |
