# Supplementary material for: Finite element simulations for investigating the strength characteristics of a 5 m composite wind turbine blade
Source: Copernicus journal article supplement (doi:10.5194/wes-5-1339-2020), 2020-10-20
Supplement: Supplementary file 6 [file METU_B_C_layers_16-17-18.pdf › RUZGEM_Blade_Geometry_and_Layup/Chassis/METU_B_C_layers_16-17-18.pdf]

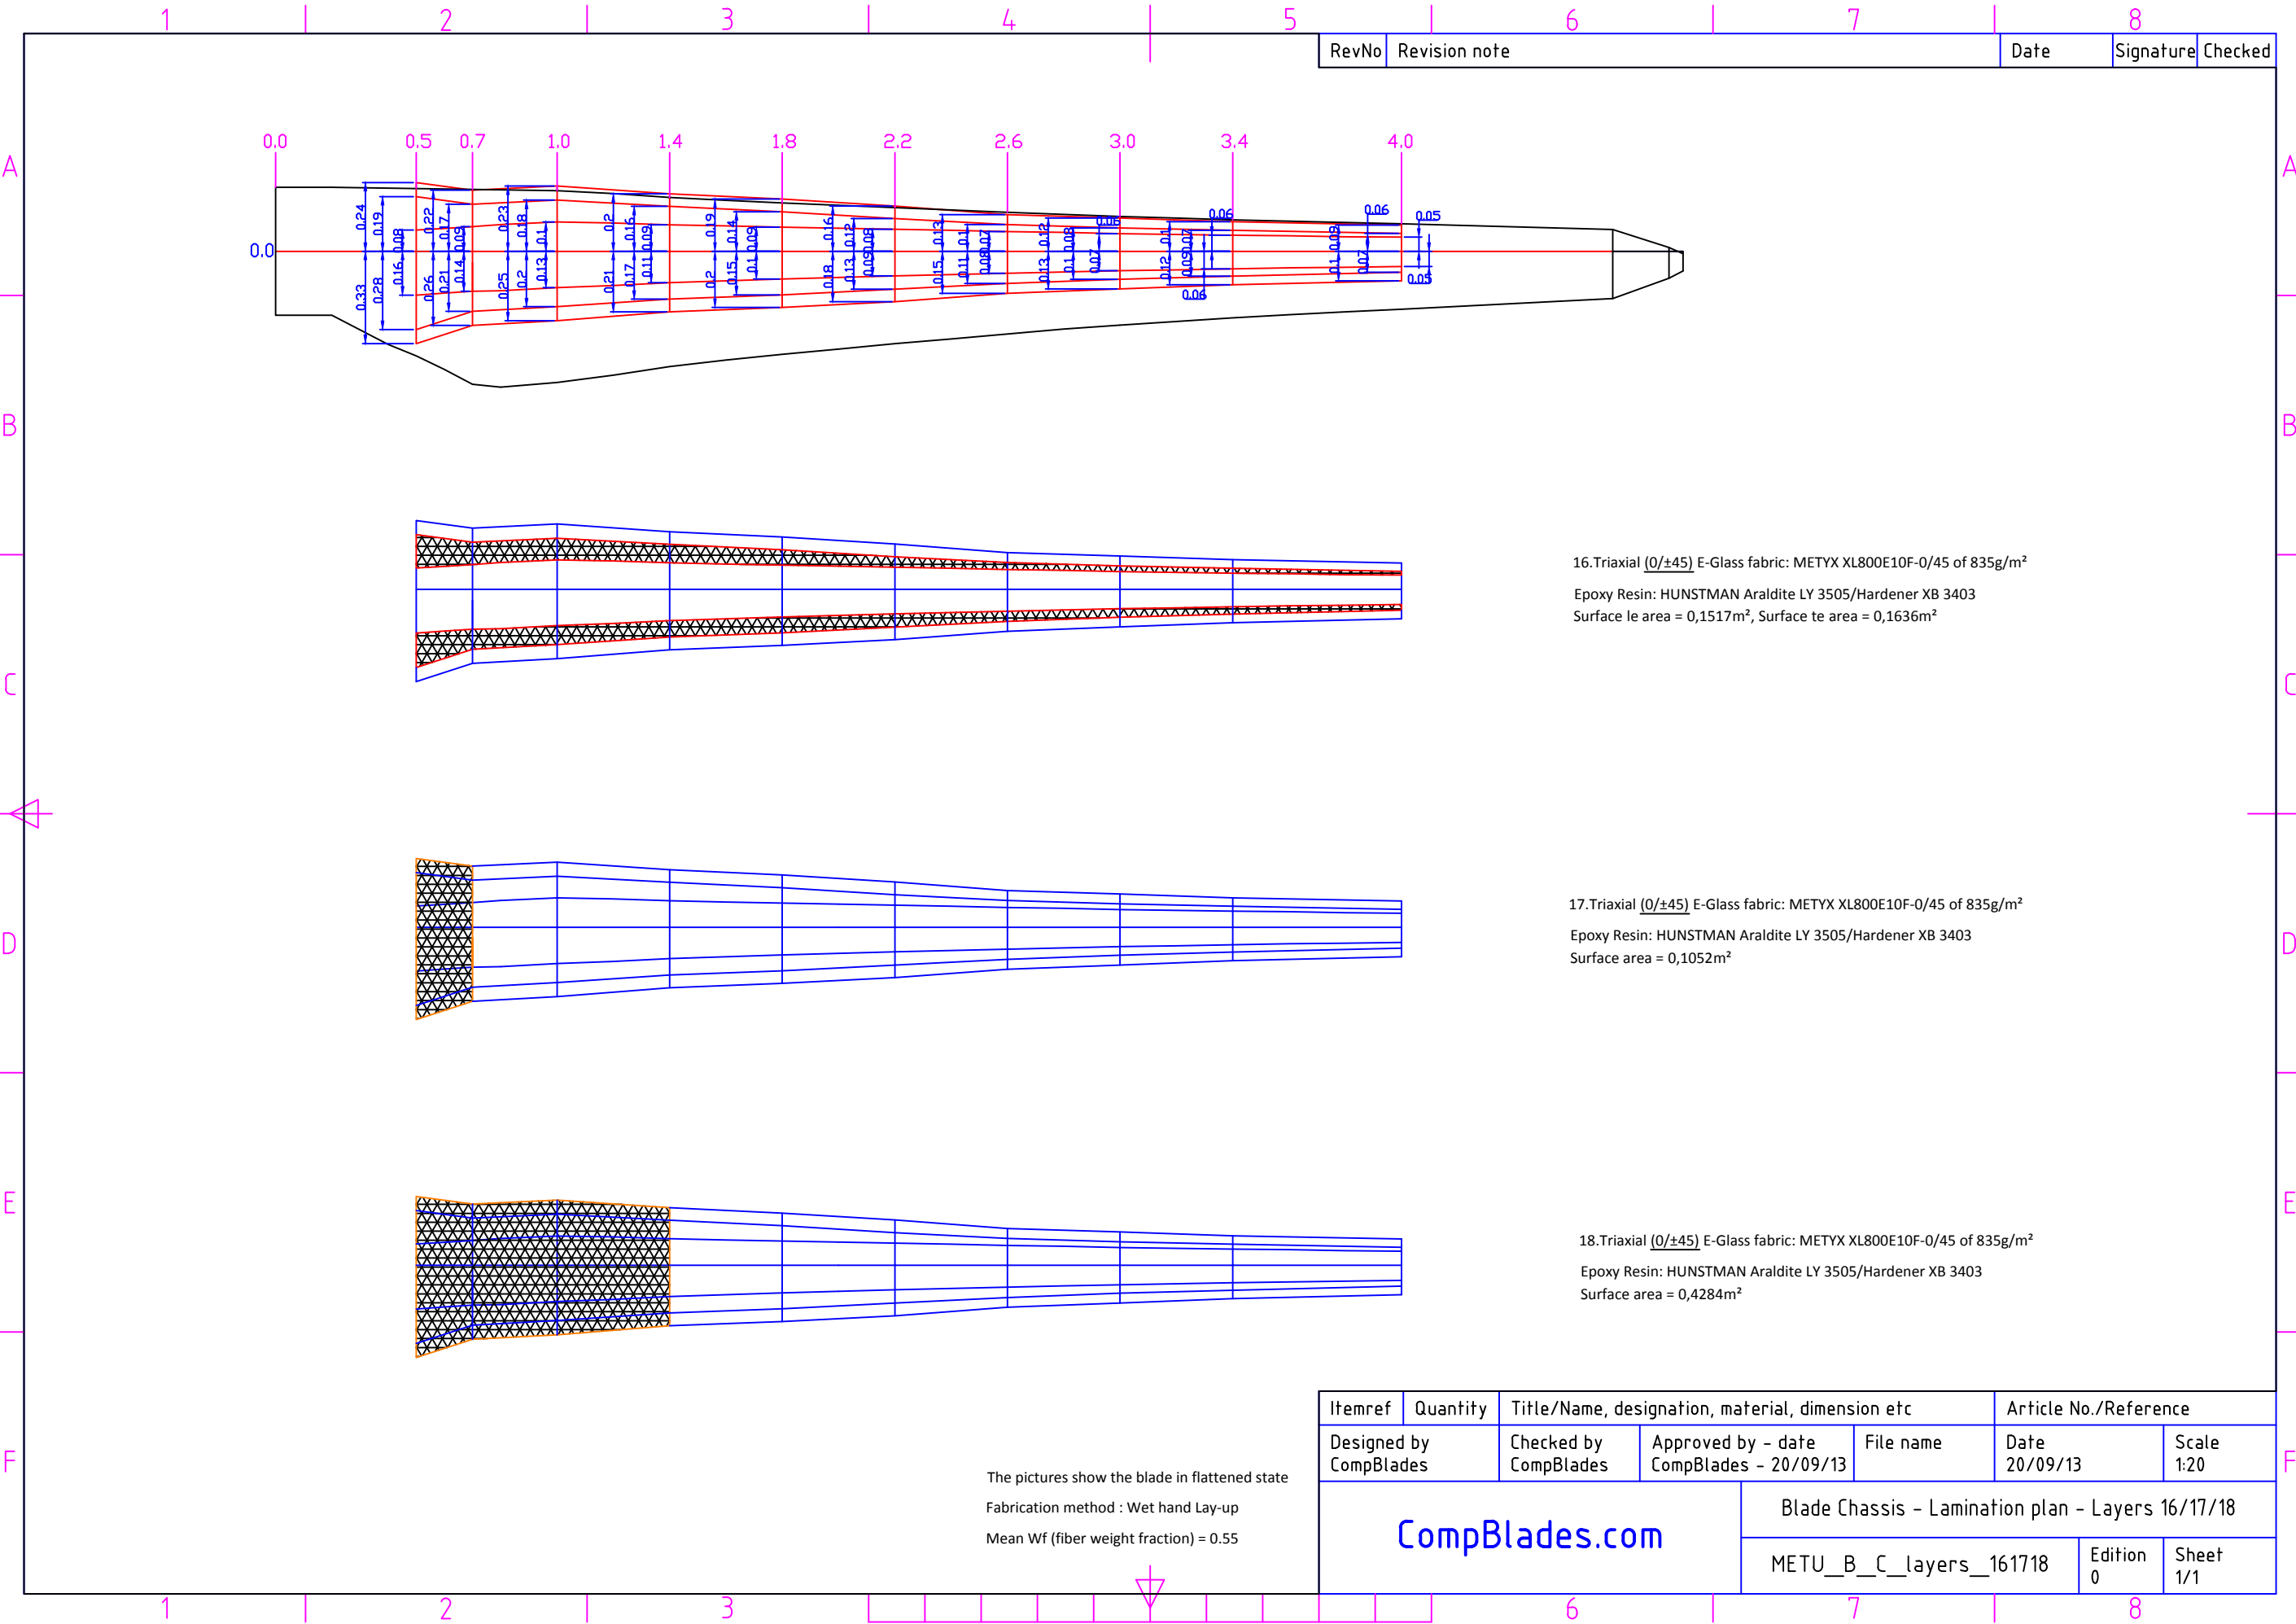

F

The pictures show the blade in flattened state  
Fabrication method : Wet hand Lay-up  
Mean Wf (fiber weight fraction) = 0.55

| Itemref                   | Quantity | Title/Name, designation, material, dimension etc |                                                   |           | Article No./Reference |               |
|---------------------------|----------|--------------------------------------------------|---------------------------------------------------|-----------|-----------------------|---------------|
| Designed by<br>CompBlades |          | Checked by<br>CompBlades                         | Approved by - date<br>CompBlades - 20/09/13       | File name | Date<br>20/09/13      | Scale<br>1:20 |
| CompBlades.com            |          |                                                  | Blade Chassis - Lamination plan - Layers 16/17/18 |           |                       |               |
|                           |          |                                                  | METU__B__C_layers__161718                         |           | Edition<br>0          | Sheet<br>1/1  |
