# Supplementary material for: Finite element simulations for investigating the strength characteristics of a 5 m composite wind turbine blade
Source: Copernicus journal article supplement (doi:10.5194/wes-5-1339-2020), 2020-10-20
Supplement: Supplementary file 12 [file METU_B_P_layers_10-11-12.pdf › RUZGEM_Blade_Geometry_and_Layup/Pressure side/METU_B_P_layers_10-11-12.pdf]

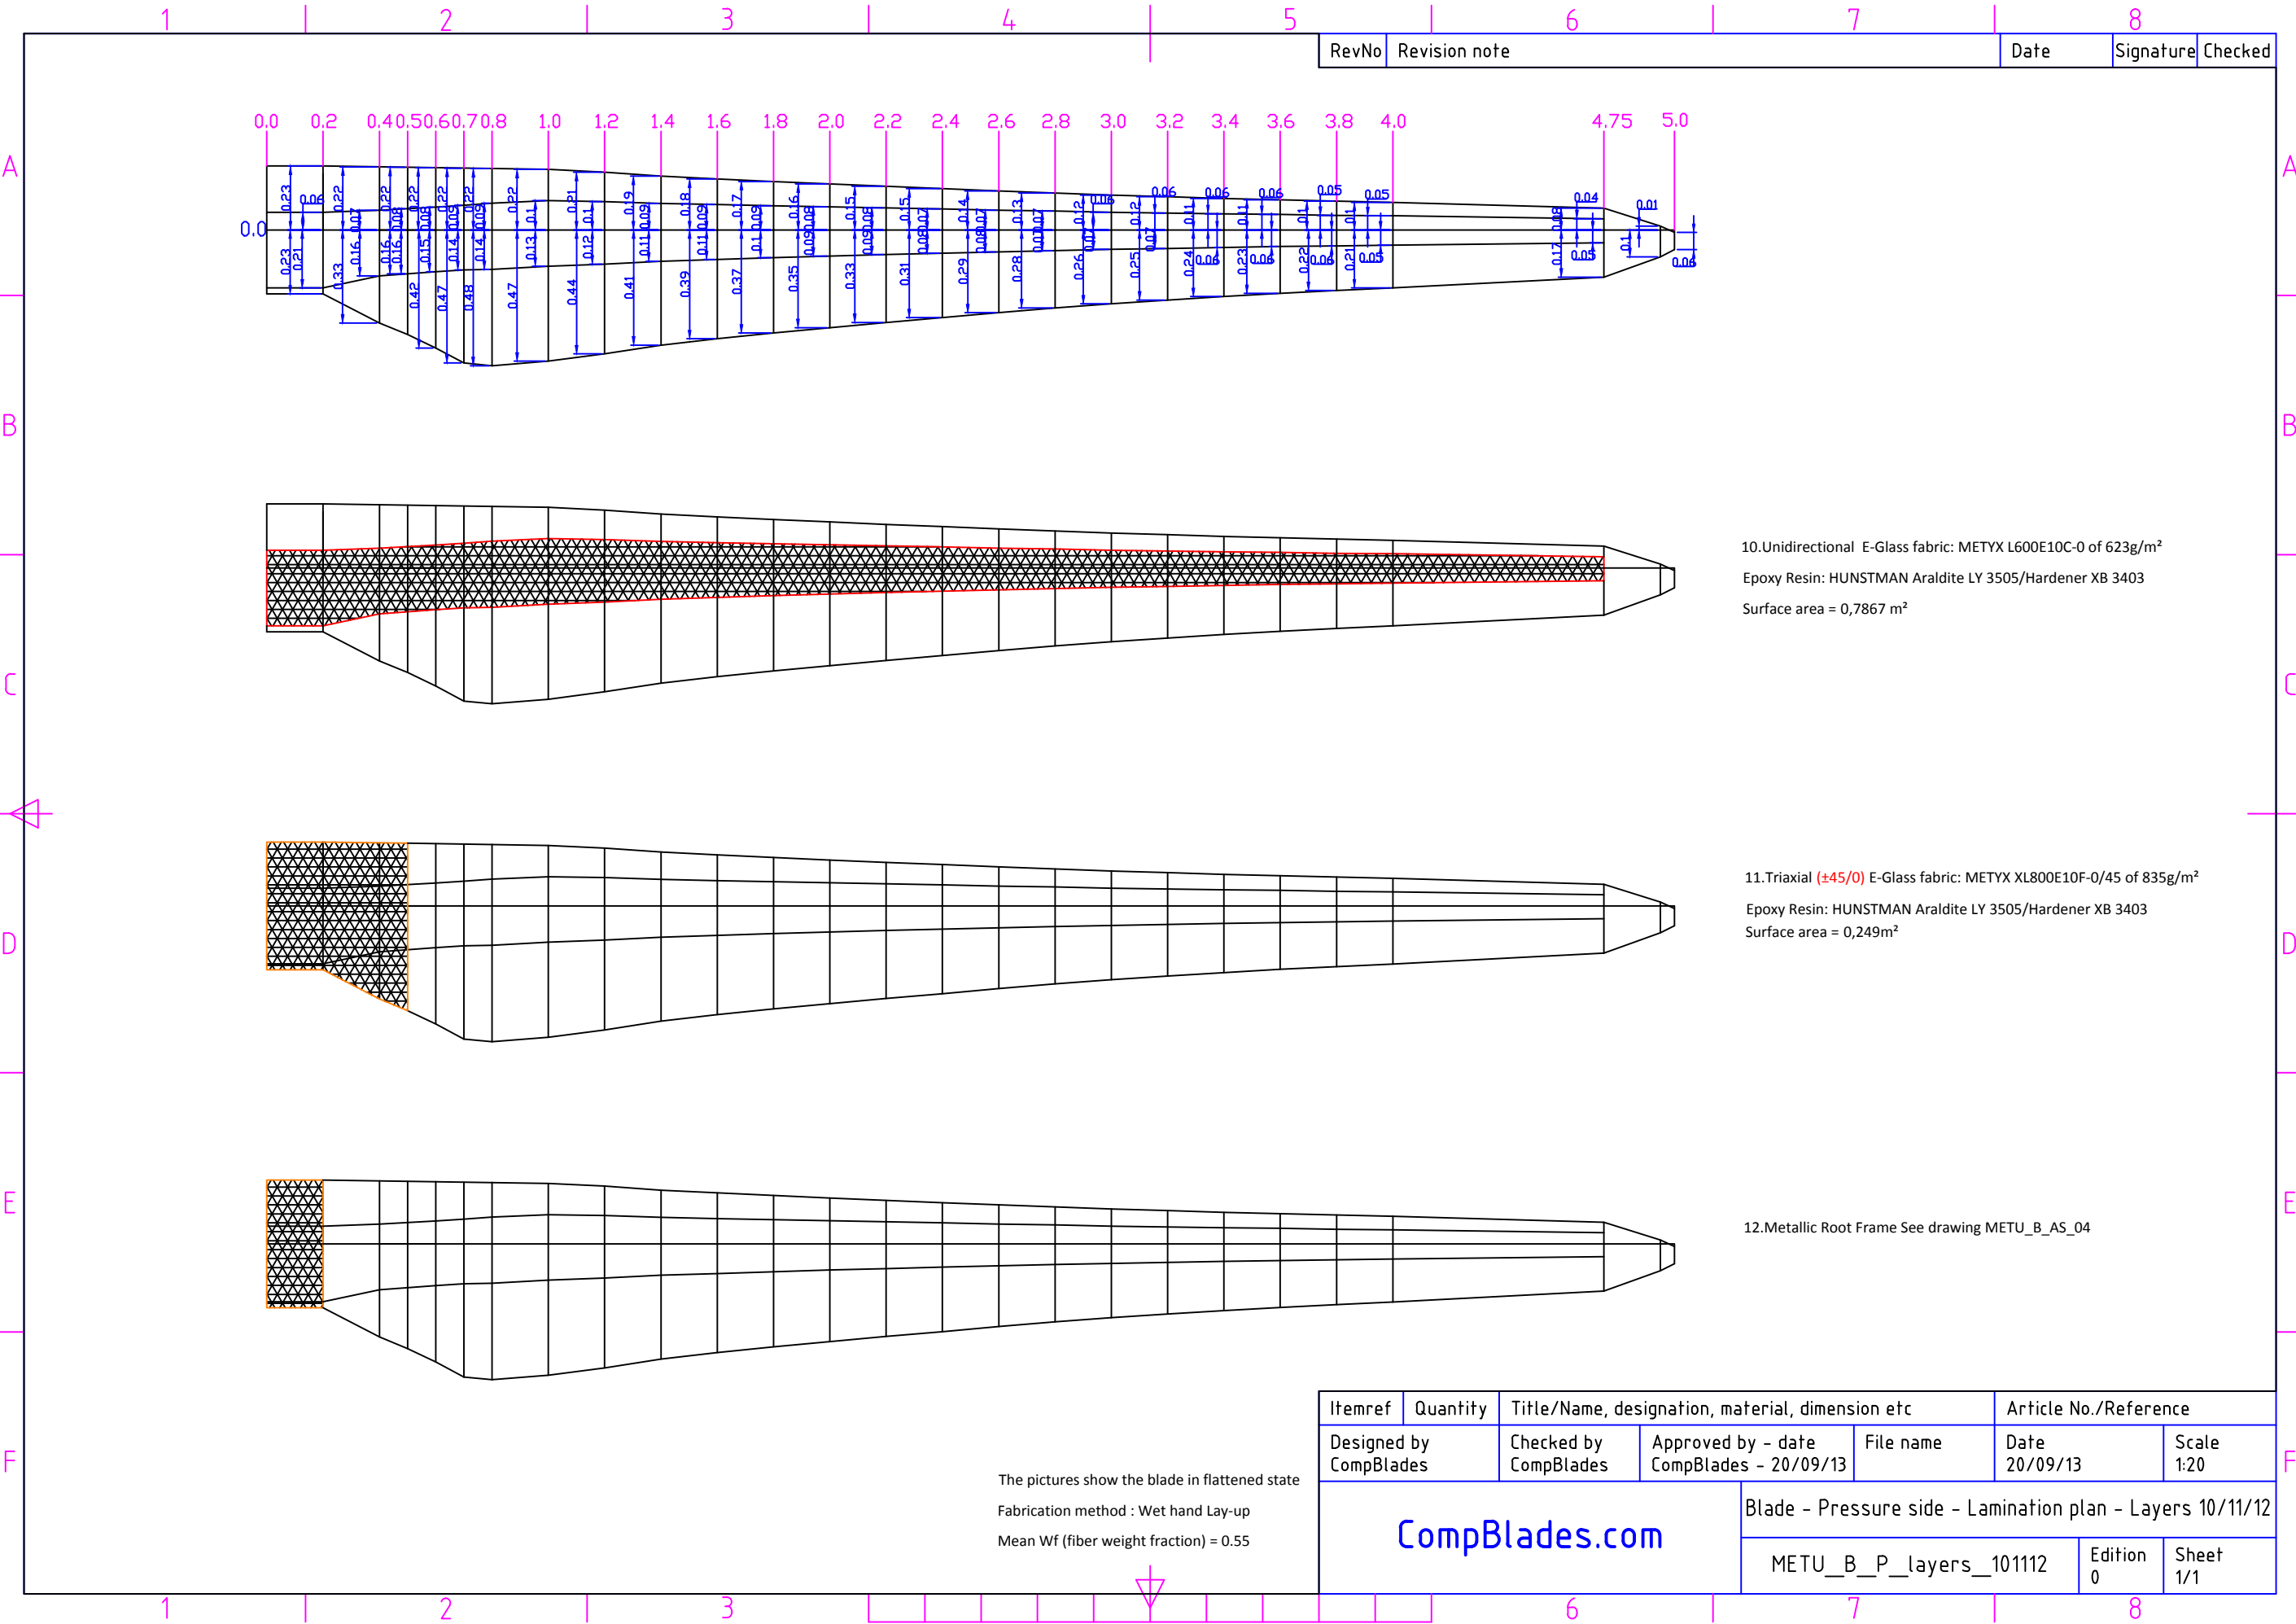

| RevNo | Revision note | Date | Signature | Checked |
|-------|---------------|------|-----------|---------|
|-------|---------------|------|-----------|---------|

The pictures show the blade in flattened state  
Fabrication method : Wet hand Lay-up  
Mean Wf (fiber weight fraction) = 0.55

|                                                           |                          |                                             |           |                                                           |               |
|-----------------------------------------------------------|--------------------------|---------------------------------------------|-----------|-----------------------------------------------------------|---------------|
| Designed by<br>CompBlades                                 | Checked by<br>CompBlades | Approved by - date<br>CompBlades - 20/09/13 | File name | Date<br>20/09/13                                          | Scale<br>1:20 |
| Blade - Pressure side - Lamination plan - Layers 10/11/12 |                          |                                             |           | Blade - Pressure side - Lamination plan - Layers 10/11/12 |               |
| METU_B_P_layers_101112                                    |                          |                                             |           | Edition<br>0                                              | Sheet<br>1/1  |

CompBlades.com
