# Supplementary material for: Finite element simulations for investigating the strength characteristics of a 5 m composite wind turbine blade
Source: Copernicus journal article supplement (doi:10.5194/wes-5-1339-2020), 2020-10-20
Supplement: Supplementary file 13 [file METU_B_P_layers_13-14-15.pdf › RUZGEM_Blade_Geometry_and_Layup/Pressure side/METU_B_P_layers_13-14-15.pdf]

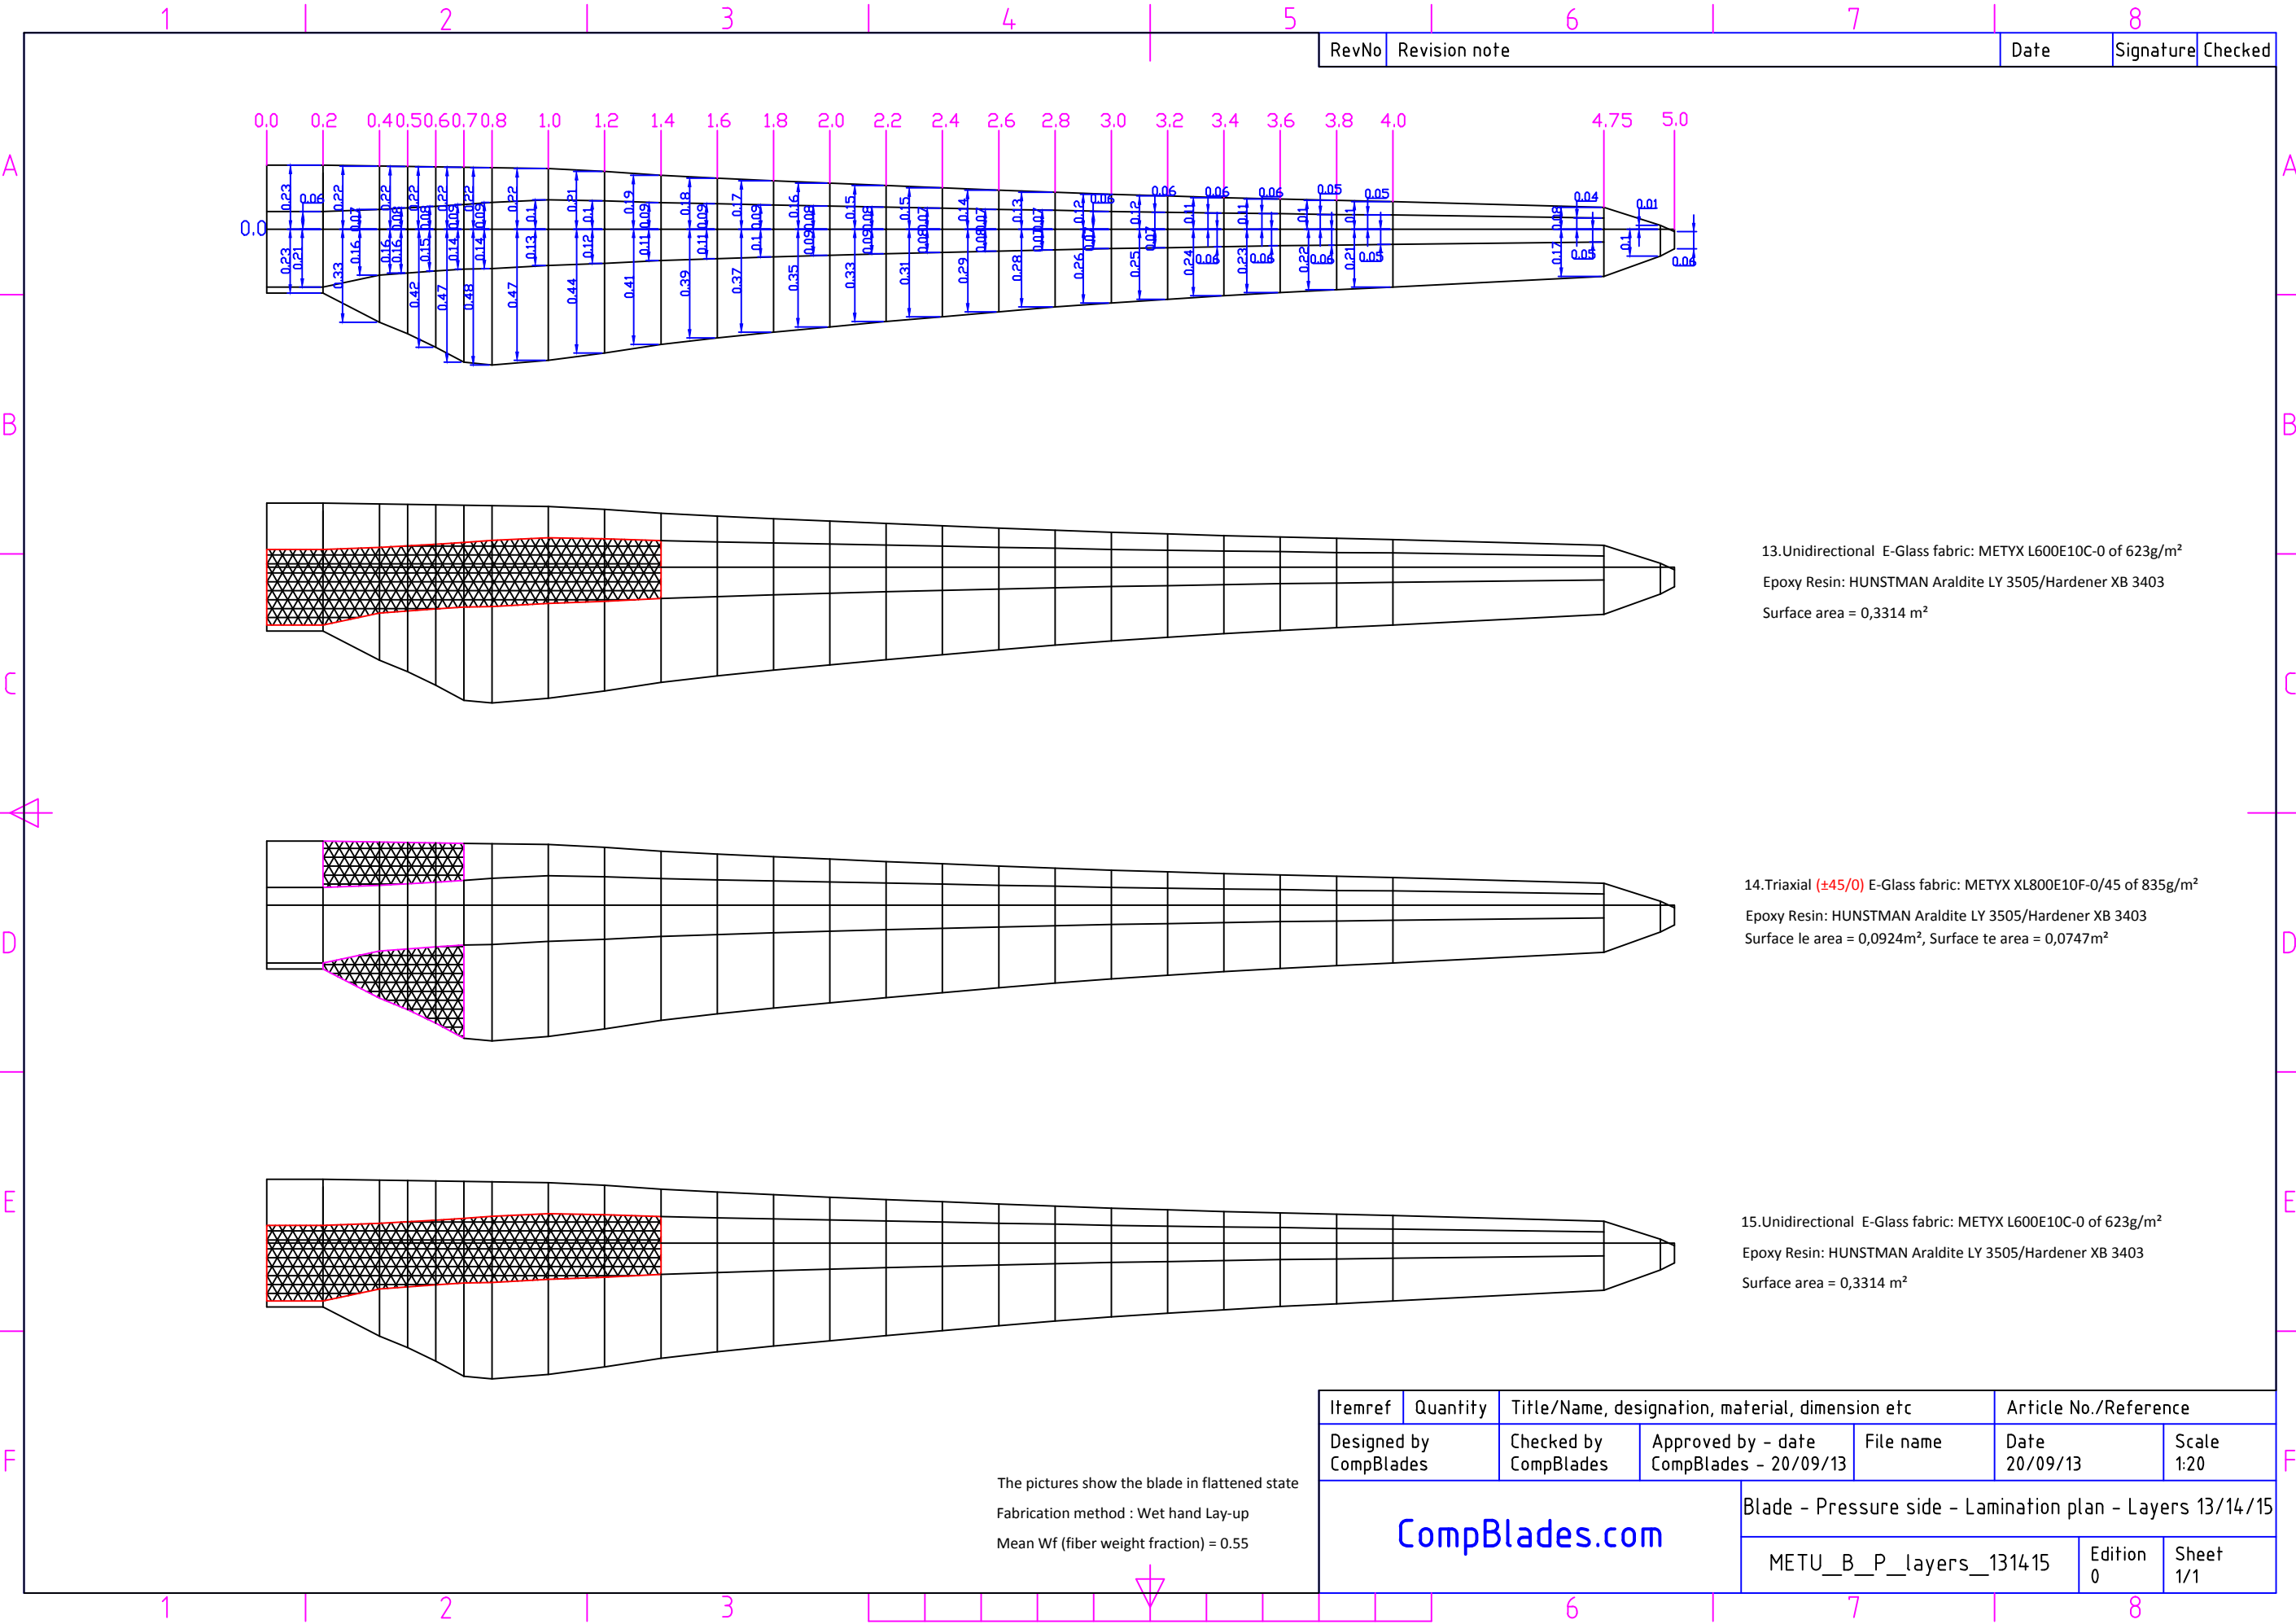

The pictures show the blade in flattened state  
Fabrication method : Wet hand Lay-up  
Mean Wf (fiber weight fraction) = 0.55

CompBlades.com
