# Supplementary material for: Finite element simulations for investigating the strength characteristics of a 5 m composite wind turbine blade
Source: Copernicus journal article supplement (doi:10.5194/wes-5-1339-2020), 2020-10-20
Supplement: Supplementary file 15 [file METU_B_P_layers_19-20-21.pdf › RUZGEM_Blade_Geometry_and_Layup/Pressure side/METU_B_P_layers_19-20-21.pdf]

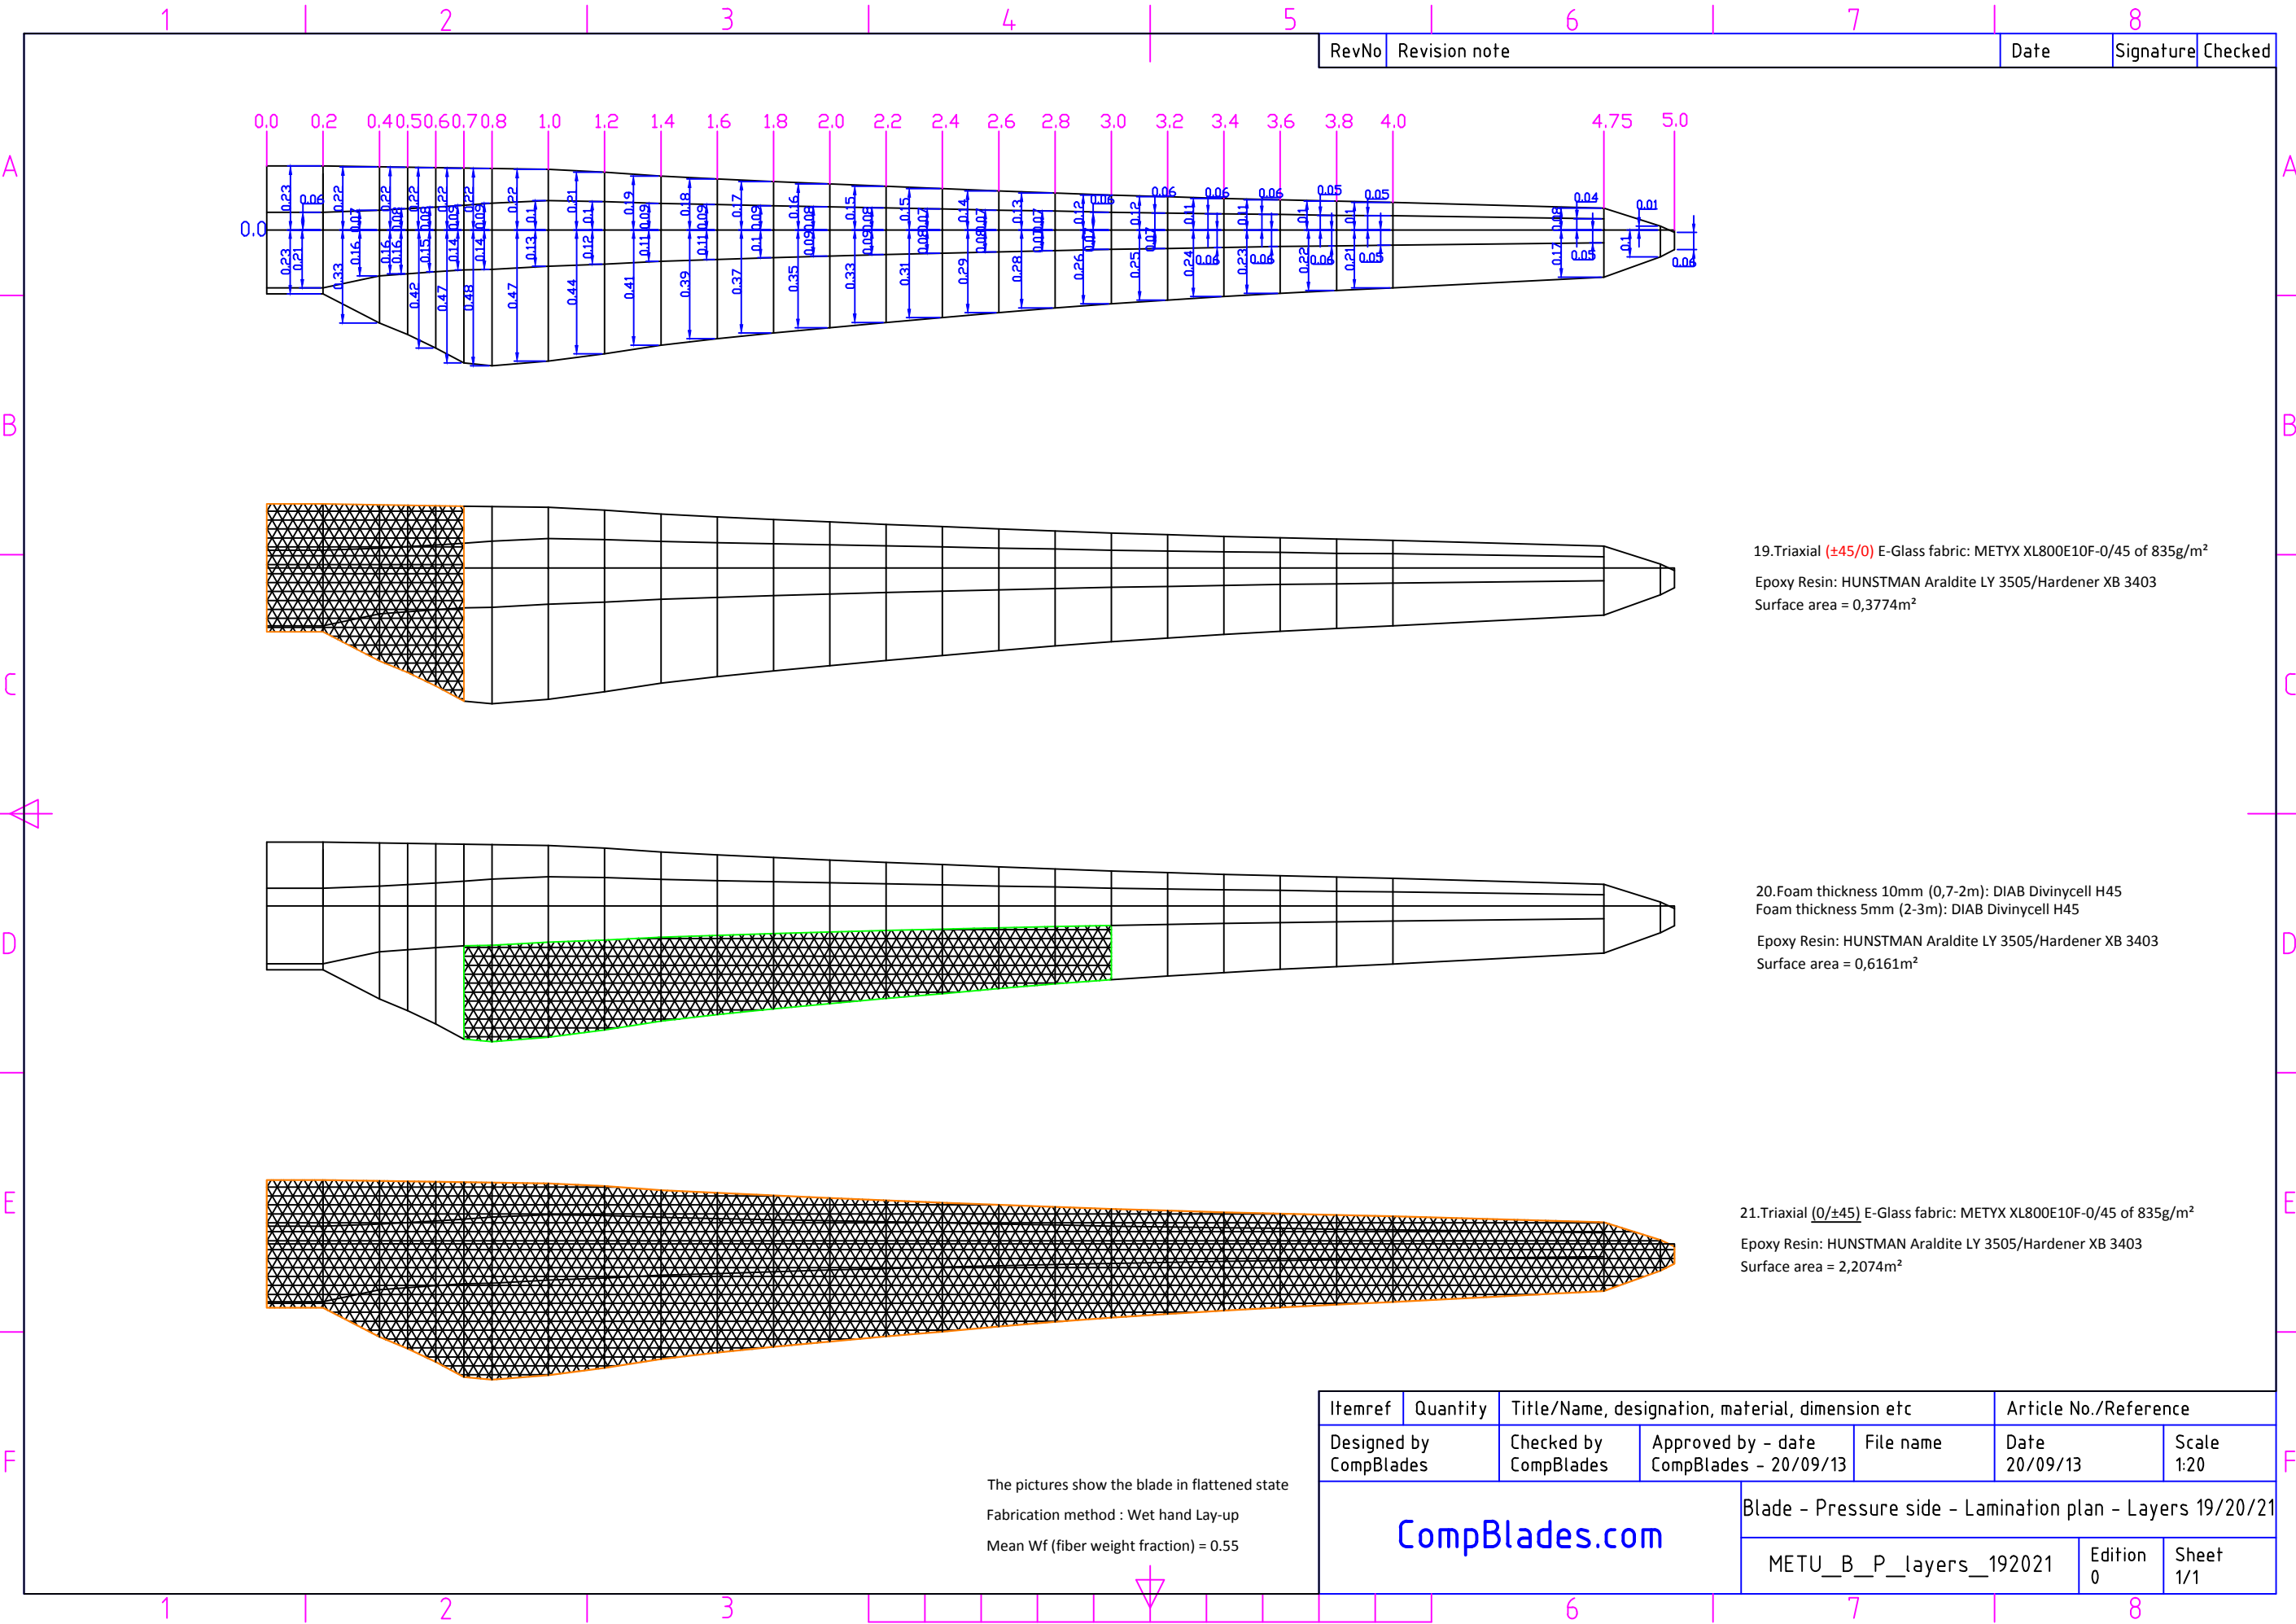

| RevNo | Revision note | Date | Signature | Checked |
|-------|---------------|------|-----------|---------|
|-------|---------------|------|-----------|---------|

19.Triaxial (±45/0) E-Glass fabric: METYX XL800E10F-0/45 of 835g/m²  
Epoxy Resin: HUNSTMAN Araldite LY 3505/Hardener XB 3403  
Surface area = 0,3774m²

20.Foam thickness 10mm (0,7-2m): DIAB Divinycell H45  
Foam thickness 5mm (2-3m): DIAB Divinycell H45  
Epoxy Resin: HUNSTMAN Araldite LY 3505/Hardener XB 3403  
Surface area = 0,6161m²

21.Triaxial (0/±45) E-Glass fabric: METYX XL800E10F-0/45 of 835g/m²  
Epoxy Resin: HUNSTMAN Araldite LY 3505/Hardener XB 3403  
Surface area = 2,2074m²

The pictures show the blade in flattened state  
Fabrication method : Wet hand Lay-up  
Mean Wf (fiber weight fraction) = 0.55

|                           |          |                                                  |                                                           |           |                       |               |
|---------------------------|----------|--------------------------------------------------|-----------------------------------------------------------|-----------|-----------------------|---------------|
| Itemref                   | Quantity | Title/Name, designation, material, dimension etc |                                                           |           | Article No./Reference |               |
| Designed by<br>CompBlades |          | Checked by<br>CompBlades                         | Approved by – date<br>CompBlades – 20/09/13               | File name | Date<br>20/09/13      | Scale<br>1:20 |
| CompBlades.com            |          |                                                  | Blade – Pressure side – Lamination plan – Layers 19/20/21 |           |                       |               |
|                           |          |                                                  | METU__B__P__layers__192021                                |           | Edition<br>0          | Sheet<br>1/1  |
