# Supplementary material for: Finite element simulations for investigating the strength characteristics of a 5 m composite wind turbine blade
Source: Copernicus journal article supplement (doi:10.5194/wes-5-1339-2020), 2020-10-20
Supplement: Supplementary file 16 [file METU_B_S_001.pdf › RUZGEM_Blade_Geometry_and_Layup/Suction side/METU_B_S_001.pdf]

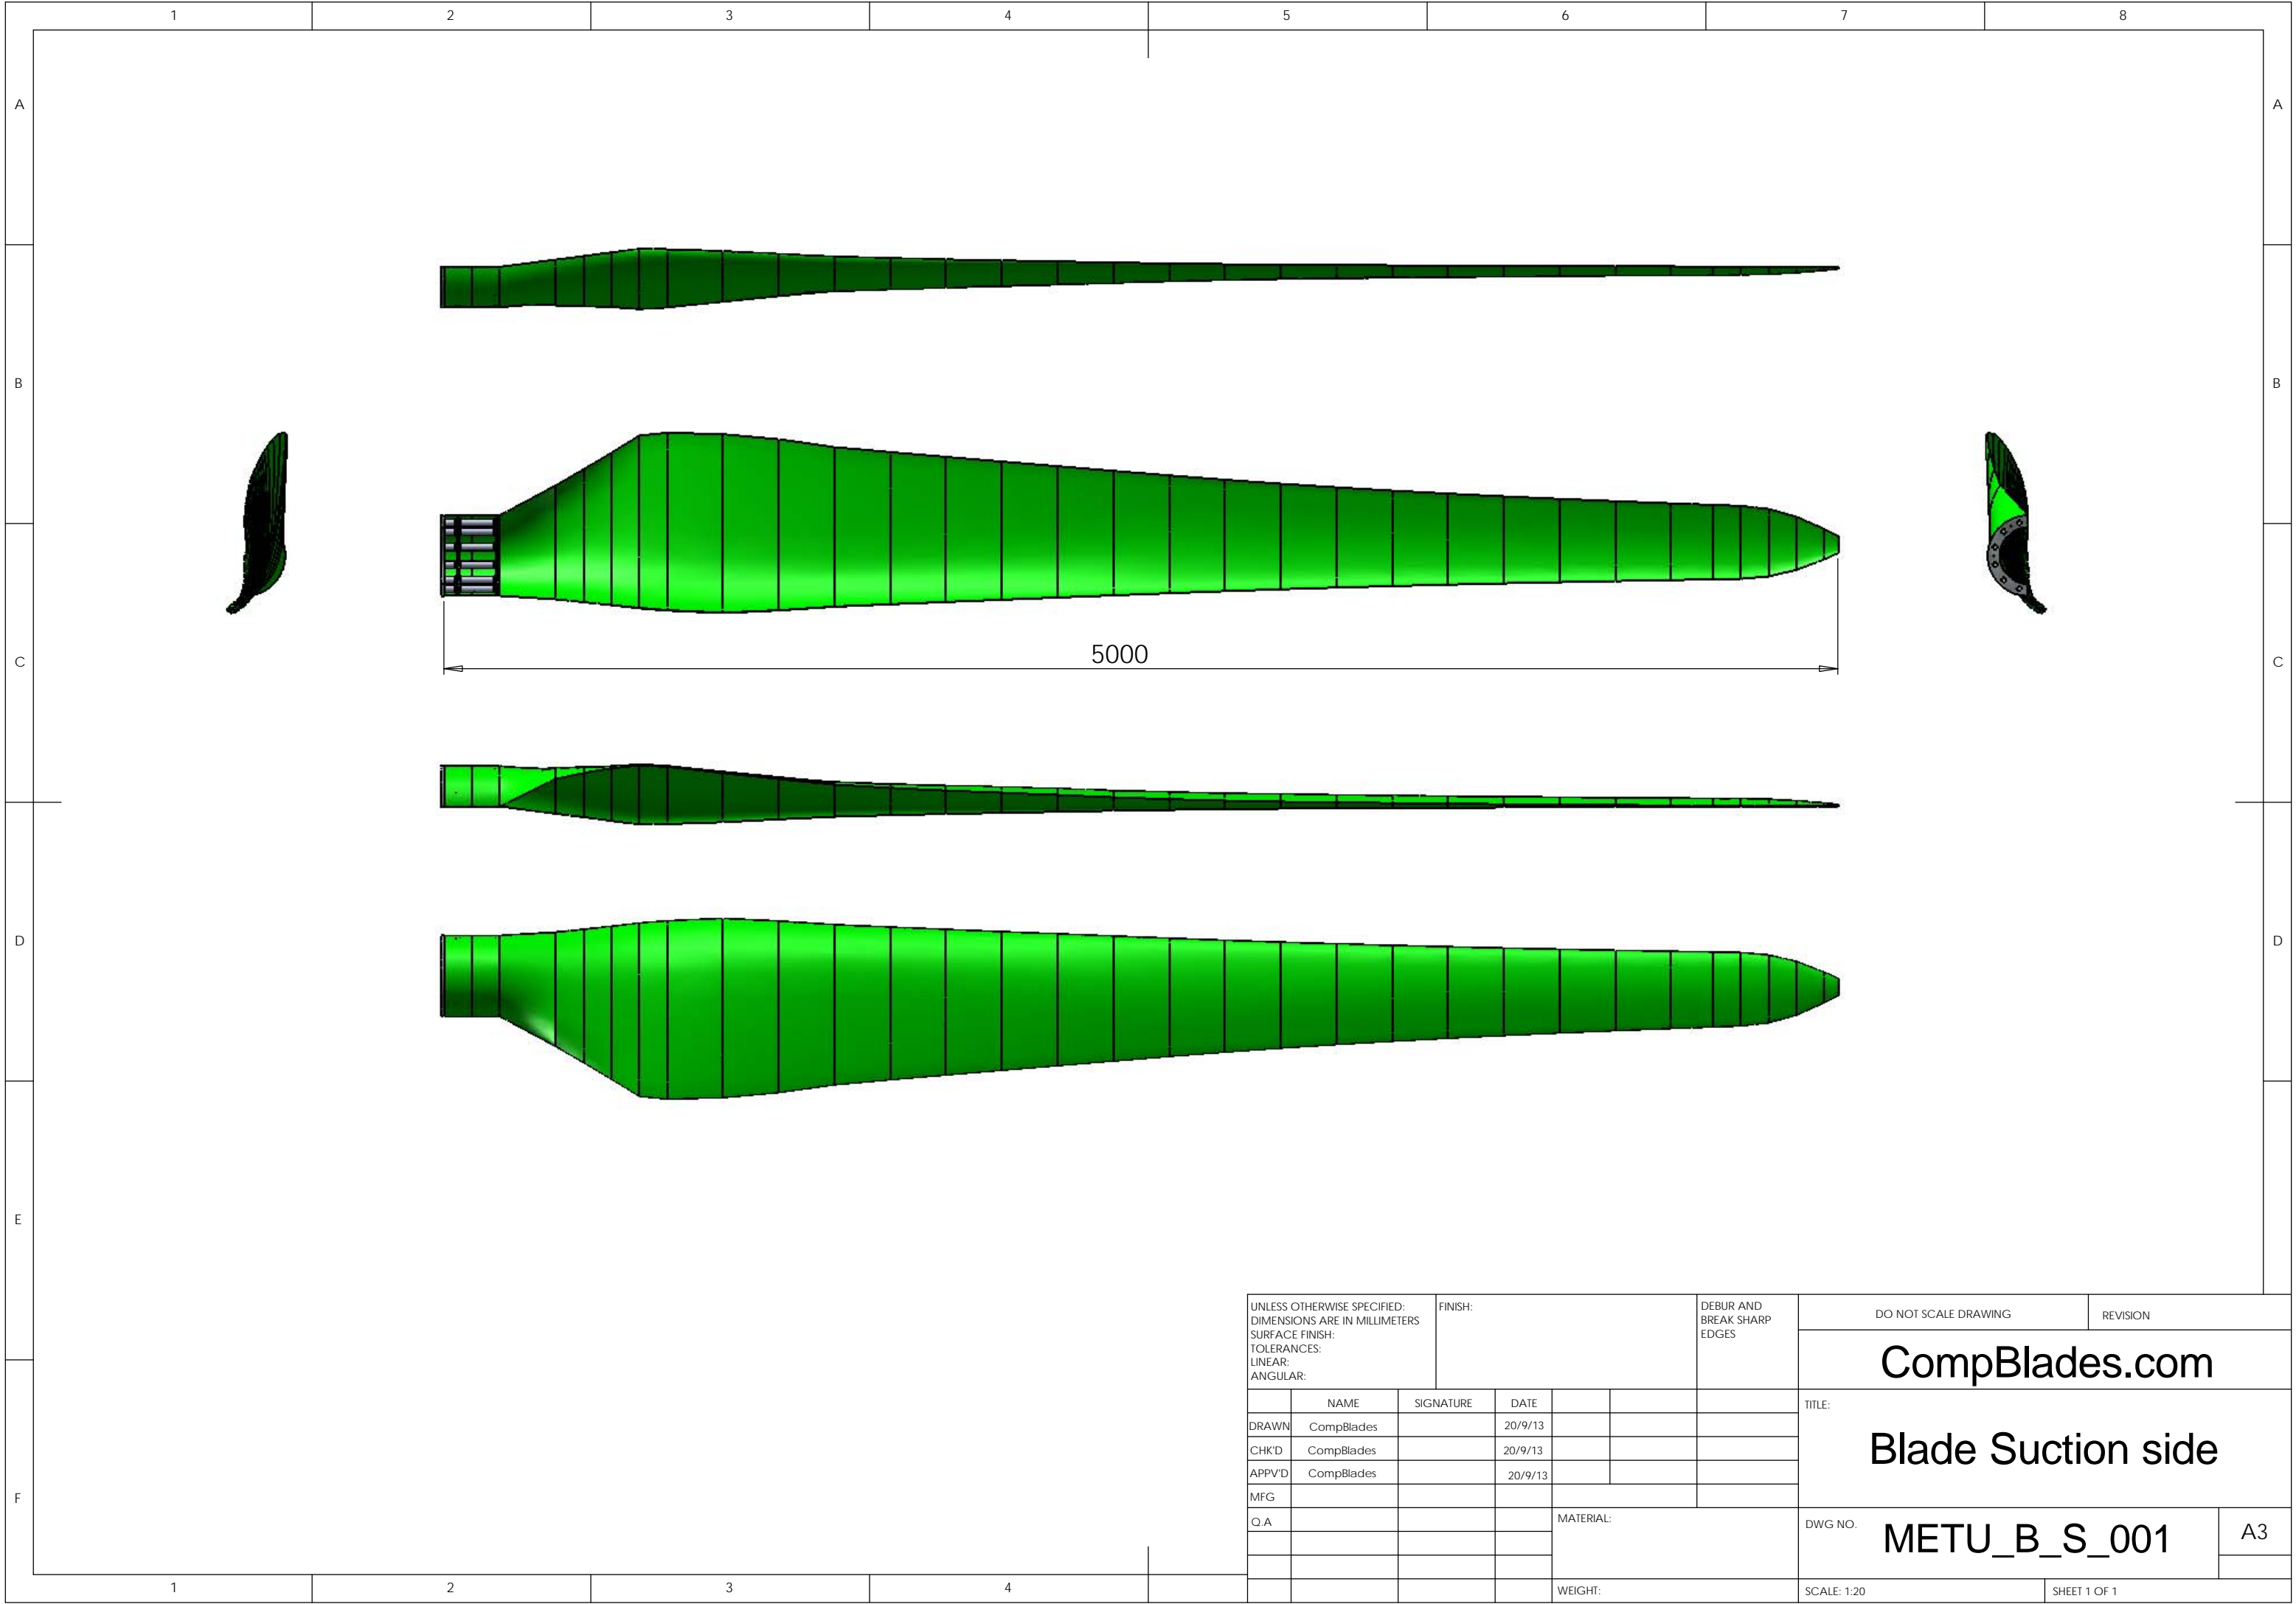

|                                                                                                                       |  |            |           |         |           |                                   |                    |                      |  |              |  |
|-----------------------------------------------------------------------------------------------------------------------|--|------------|-----------|---------|-----------|-----------------------------------|--------------------|----------------------|--|--------------|--|
| UNLESS OTHERWISE SPECIFIED:<br>DIMENSIONS ARE IN MILLIMETERS<br>SURFACE FINISH:<br>TOLERANCES:<br>LINEAR:<br>ANGULAR: |  |            |           | FINISH: |           | DEBUR AND<br>BREAK SHARP<br>EDGES |                    | DO NOT SCALE DRAWING |  | REVISION     |  |
|                                                                                                                       |  |            |           |         |           |                                   |                    | CompBlades.com       |  |              |  |
|                                                                                                                       |  | NAME       | SIGNATURE | DATE    |           |                                   | TITLE:             |                      |  |              |  |
| DRAWN                                                                                                                 |  | CompBlades |           | 20/9/13 |           |                                   | Blade Suction side |                      |  |              |  |
| CHK'D                                                                                                                 |  | CompBlades |           | 20/9/13 |           |                                   |                    |                      |  |              |  |
| APP'V'D                                                                                                               |  | CompBlades |           | 20/9/13 |           |                                   |                    |                      |  |              |  |
| MFG                                                                                                                   |  |            |           |         |           |                                   |                    |                      |  |              |  |
| Q.A                                                                                                                   |  |            |           |         | MATERIAL: |                                   |                    | DWG NO.              |  | A3           |  |
|                                                                                                                       |  |            |           |         |           |                                   |                    | METU_B_S_001         |  |              |  |
|                                                                                                                       |  |            |           |         |           |                                   |                    |                      |  |              |  |
|                                                                                                                       |  |            |           |         | WEIGHT:   |                                   |                    | SCALE: 1:20          |  | SHEET 1 OF 1 |  |
