# Supplementary material for: Finite element simulations for investigating the strength characteristics of a 5 m composite wind turbine blade
Source: Copernicus journal article supplement (doi:10.5194/wes-5-1339-2020), 2020-10-20
Supplement: Supplementary file 17 [file METU_B_S_layers_01-02-03.pdf › RUZGEM_Blade_Geometry_and_Layup/Suction side/METU_B_S_layers_01-02-03.pdf]

|       |               |      |           |         |
|-------|---------------|------|-----------|---------|
| RevNo | Revision note | Date | Signature | Checked |
|-------|---------------|------|-----------|---------|

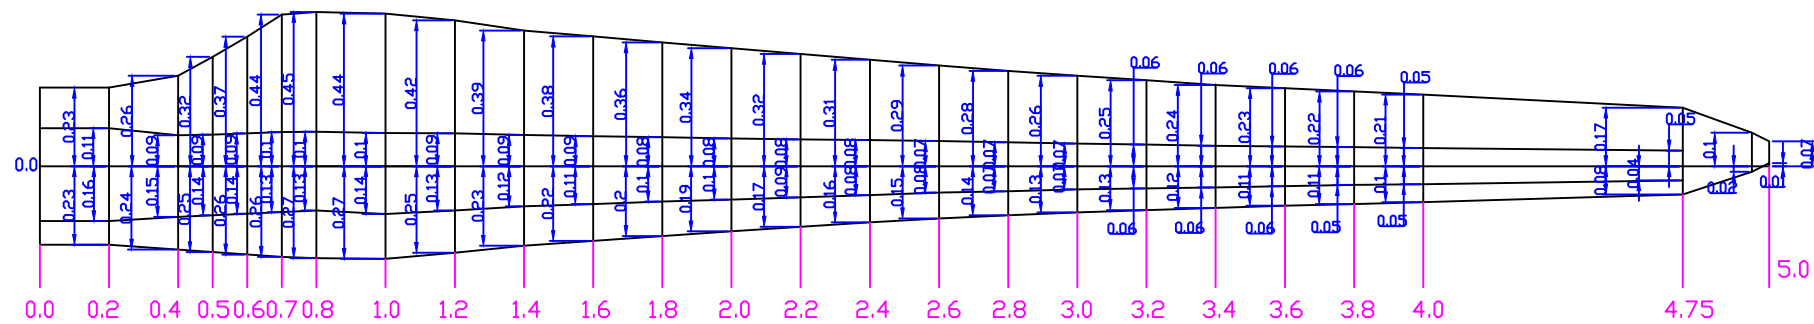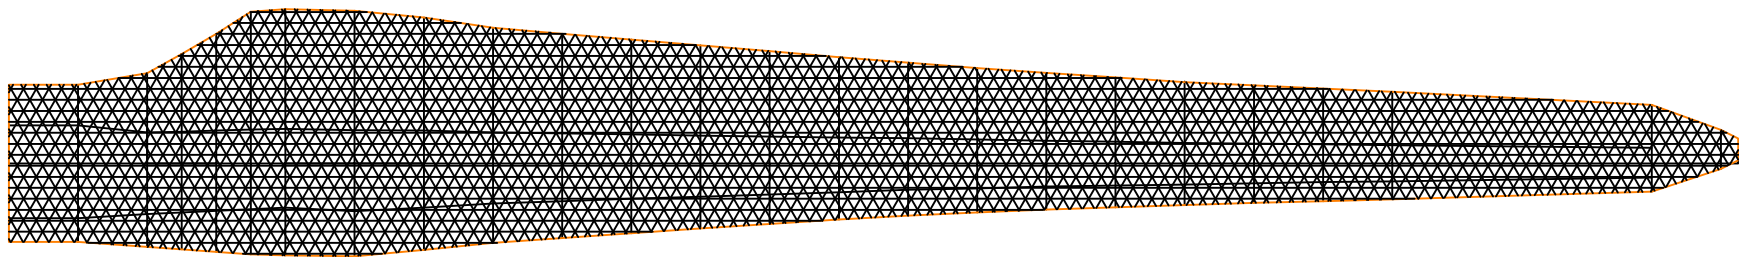

1.Transparent Gel coat: BASF RELEST Wind Gelcoat  
Surface area = 2,2506 m²

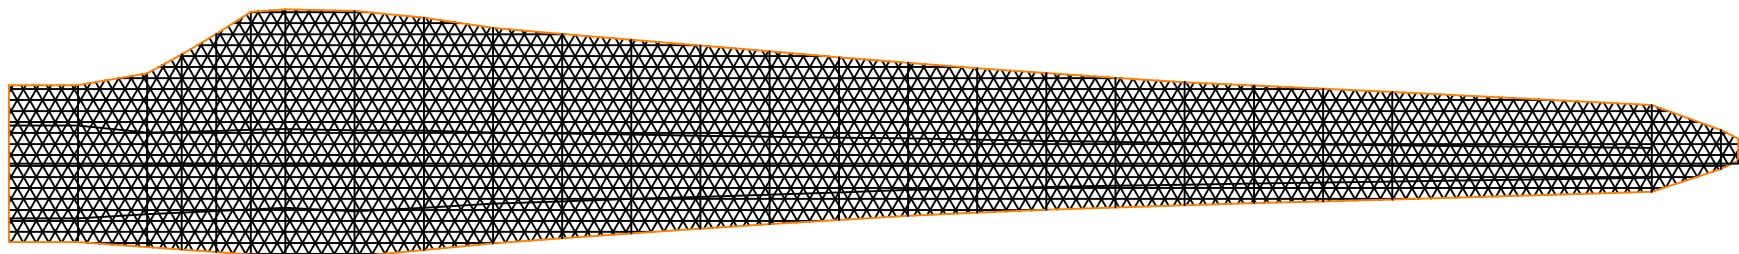

2.CSM 300 E-Glass fabric: Chopped strand mat of 300g/m²  
Epoxy Resin: HUNSTMAN Araldite LY 3505/Hardener XB 3403  
Surface area = 2,2506 m²

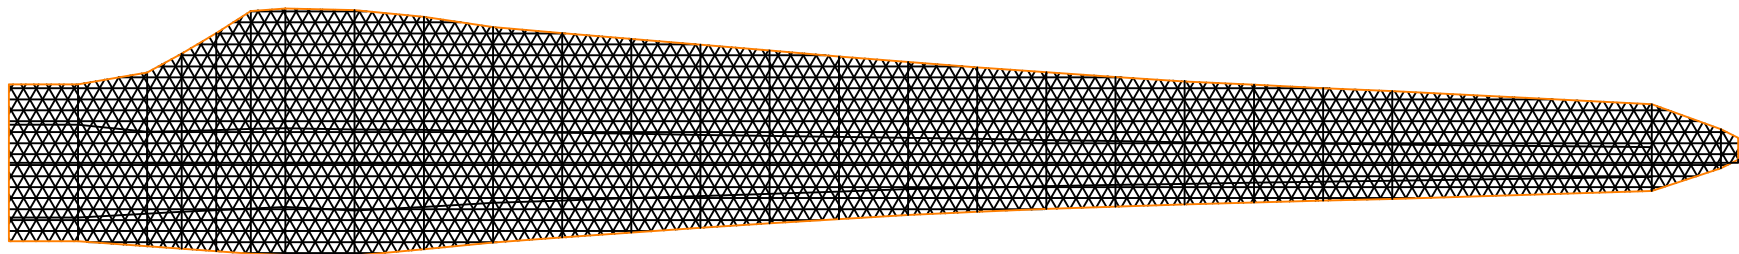

3.Triaxial (±45/0) E-Glass fabric: METYX XL800E10F-0/45 of 835g/m²  
Epoxy Resin: HUNSTMAN Araldite LY 3505/Hardener XB 3403  
Surface area = 2,2506 m²

The pictures show the blade in flattened state  
Fabrication method : Wet hand Lay-up  
Mean Wf (fiber weight fraction) = 0.55

| Itemref                   | Quantity                 | Title/Name, designation, material, dimension etc |                                                       | Article No./Reference |               |
|---------------------------|--------------------------|--------------------------------------------------|-------------------------------------------------------|-----------------------|---------------|
| Designed by<br>CompBlades | Checked by<br>CompBlades | Approved by – date<br>CompBlades – 20/09/13      | File name                                             | Date<br>20/09/13      | Scale<br>1:20 |
| CompBlades.com            |                          |                                                  | Blade – Suction side – Lamination plan – Layers 1/2/3 |                       |               |
|                           |                          |                                                  | METU_B_S_layers_010203                                | Edition<br>0          | Sheet<br>1/1  |
