# Supplementary material for: Finite element simulations for investigating the strength characteristics of a 5 m composite wind turbine blade
Source: Copernicus journal article supplement (doi:10.5194/wes-5-1339-2020), 2020-10-20
Supplement: Supplementary file 18 [file METU_B_S_layers_04-05-06.pdf › RUZGEM_Blade_Geometry_and_Layup/Suction side/METU_B_S_layers_04-05-06.pdf]

| RevNo | Revision note | Date | Signature | Checked |
|-------|---------------|------|-----------|---------|
|-------|---------------|------|-----------|---------|

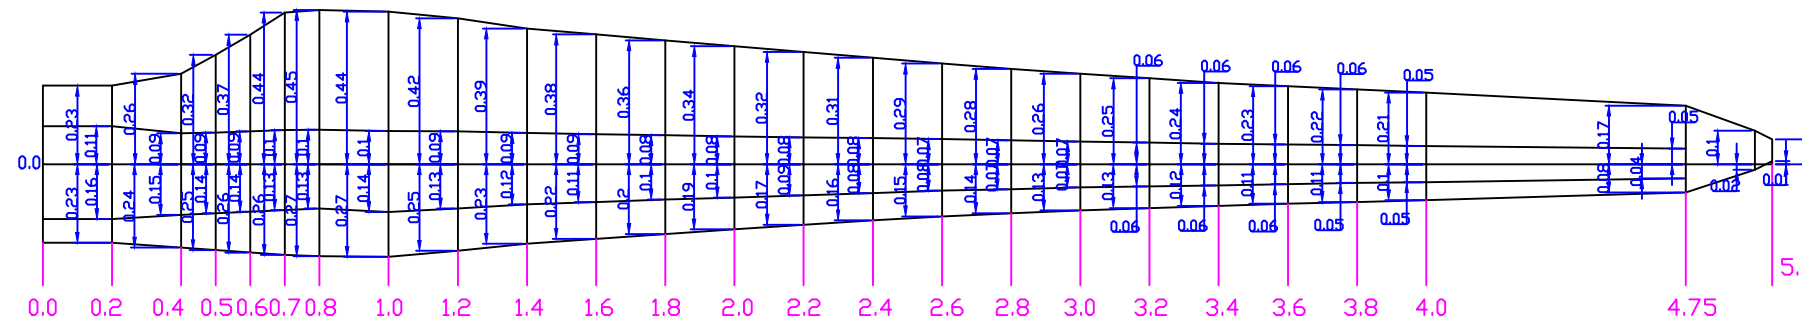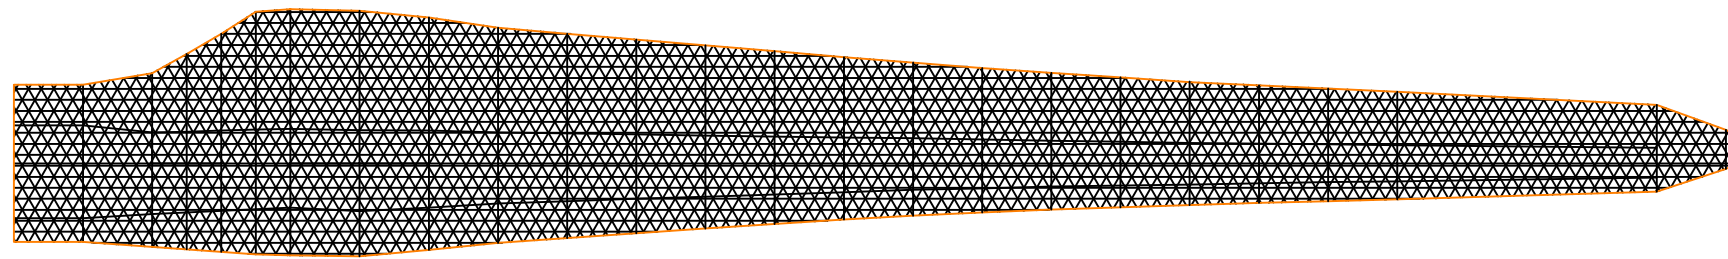

4.Triaxial ( $\pm 45/0$ ) E-Glass fabric: METYX XL800E10F-0/45 of 835g/m<sup>2</sup>  
Epoxy Resin: HUNSTMAN Araldite LY 3505/Hardener XB 3403  
Surface area = 2,2506 m<sup>2</sup>

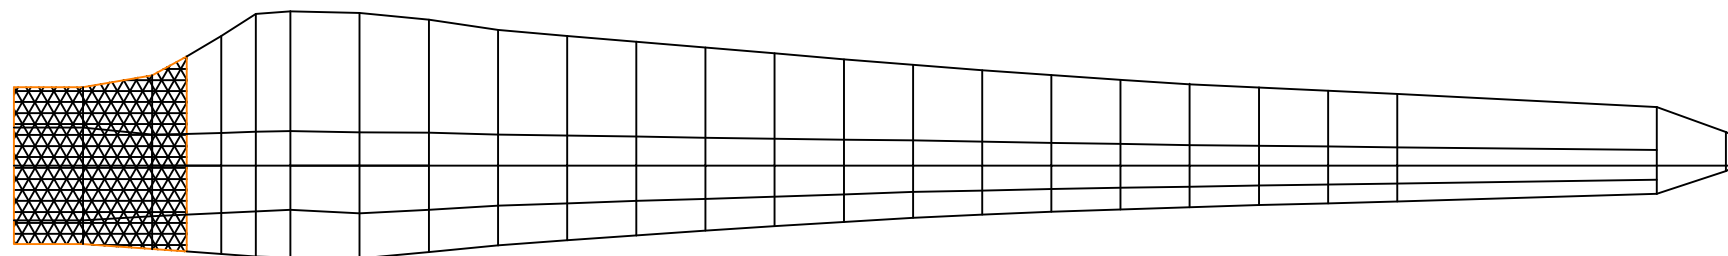

5.Triaxial ( $\pm 45/0$ ) E-Glass fabric: METYX XL800E10F-0/45 of 835g/m<sup>2</sup>  
Epoxy Resin: HUNSTMAN Araldite LY 3505/Hardener XB 3403  
Surface area = 0,2398 m<sup>2</sup>

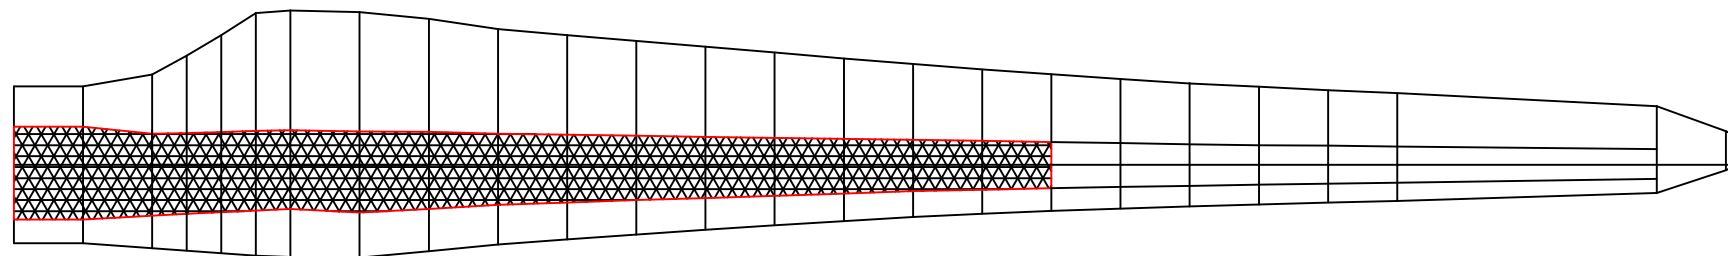

6. Unidirectional E-Glass fabric: METYX L600E10C-0 of 623g/m<sup>2</sup>  
Epoxy Resin: HUNSTMAN Araldite LY 3505/Hardener XB 3403  
Surface area = 0,6006 m<sup>2</sup>

The pictures show the blade in flattened state  
Fabrication method : Wet hand Lay-up  
Mean Wf (fiber weight fraction) = 0.55

|                           |          |                                                  |                                             |                                                       |                       |               |
|---------------------------|----------|--------------------------------------------------|---------------------------------------------|-------------------------------------------------------|-----------------------|---------------|
| Itemref                   | Quantity | Title/Name, designation, material, dimension etc |                                             |                                                       | Article No./Reference |               |
| Designed by<br>CompBlades |          | Checked by<br>CompBlades                         | Approved by - date<br>CompBlades - 20/09/13 | File name                                             | Date<br>20/09/13      | Scale<br>1:20 |
| CompBlades.com            |          |                                                  |                                             | Blade - Suction side - Lamination plan - Layers 4/5/6 |                       |               |
|                           |          |                                                  |                                             | METU_B_S_layers_040506                                |                       | Edition<br>0  |
