# Supplementary material for: Finite element simulations for investigating the strength characteristics of a 5 m composite wind turbine blade
Source: Copernicus journal article supplement (doi:10.5194/wes-5-1339-2020), 2020-10-20
Supplement: Supplementary file 20 [file METU_B_S_layers_10-11-12.pdf › RUZGEM_Blade_Geometry_and_Layup/Suction side/METU_B_S_layers_10-11-12.pdf]

| RevNo | Revision note | Date | Signature | Checked |
|-------|---------------|------|-----------|---------|
|-------|---------------|------|-----------|---------|

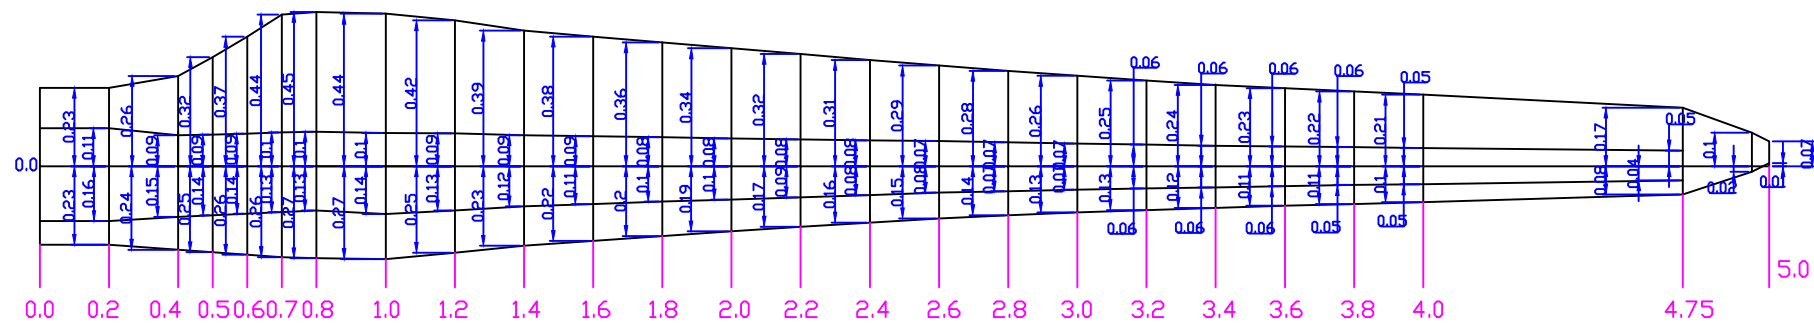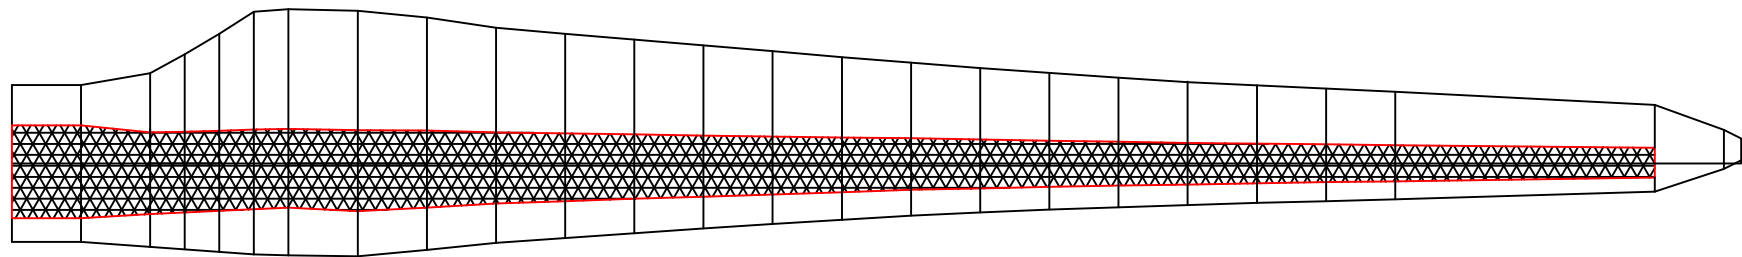

10.Unidirectional E-Glass fabric: METYX L600E10C-0 of 623g/m<sup>2</sup>  
Epoxy Resin: HUNSTMAN Araldite LY 3505/Hardener XB 3403  
Surface area = 0,79 m<sup>2</sup>

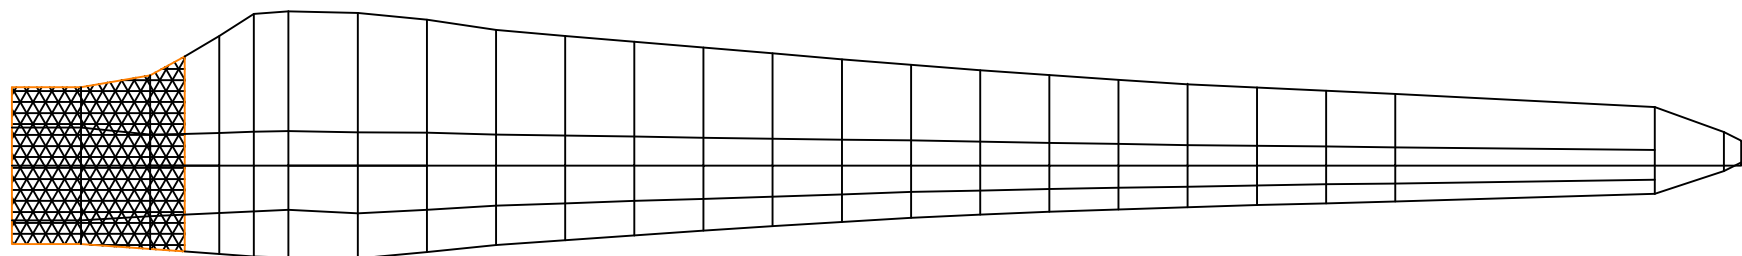

11.Triaxial ( $\pm 45/0$ ) E-Glass fabric: METYX XL800E10F-0/45 of 835g/m<sup>2</sup>  
Epoxy Resin: HUNSTMAN Araldite LY 3505/Hardener XB 3403  
Surface area = 0,2398m<sup>2</sup>

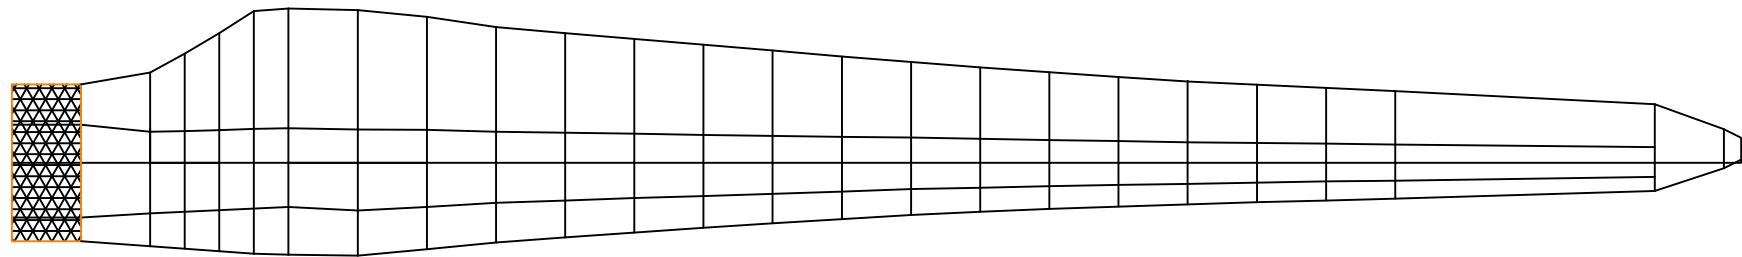

12.Metallic Root Frame See drawing METU\_B\_AS\_04

The pictures show the blade in flattened state  
Fabrication method : Wet hand Lay-up  
Mean Wf (fiber weight fraction) = 0.55

| Itemref                   | Quantity                 | Title/Name, designation, material, dimension etc |           |                                                          | Article No./Reference |              |
|---------------------------|--------------------------|--------------------------------------------------|-----------|----------------------------------------------------------|-----------------------|--------------|
| Designed by<br>CompBlades | Checked by<br>CompBlades | Approved by - date<br>CompBlades - 20/09/13      | File name | Date<br>20/09/13                                         | Scale<br>1:20         |              |
| CompBlades.com            |                          |                                                  |           | Blade - Suction side - Lamination plan - Layers 10/11/12 |                       |              |
|                           |                          |                                                  |           | METU_B_S_layers_101112                                   | Edition<br>0          | Sheet<br>1/1 |
