# Supplementary material for: Finite element simulations for investigating the strength characteristics of a 5 m composite wind turbine blade
Source: Copernicus journal article supplement (doi:10.5194/wes-5-1339-2020), 2020-10-20
Supplement: Supplementary file 21 [file METU_B_S_layers_13-14-15.pdf › RUZGEM_Blade_Geometry_and_Layup/Suction side/METU_B_S_layers_13-14-15.pdf]

|       |               |      |           |         |
|-------|---------------|------|-----------|---------|
| RevNo | Revision note | Date | Signature | Checked |
|-------|---------------|------|-----------|---------|

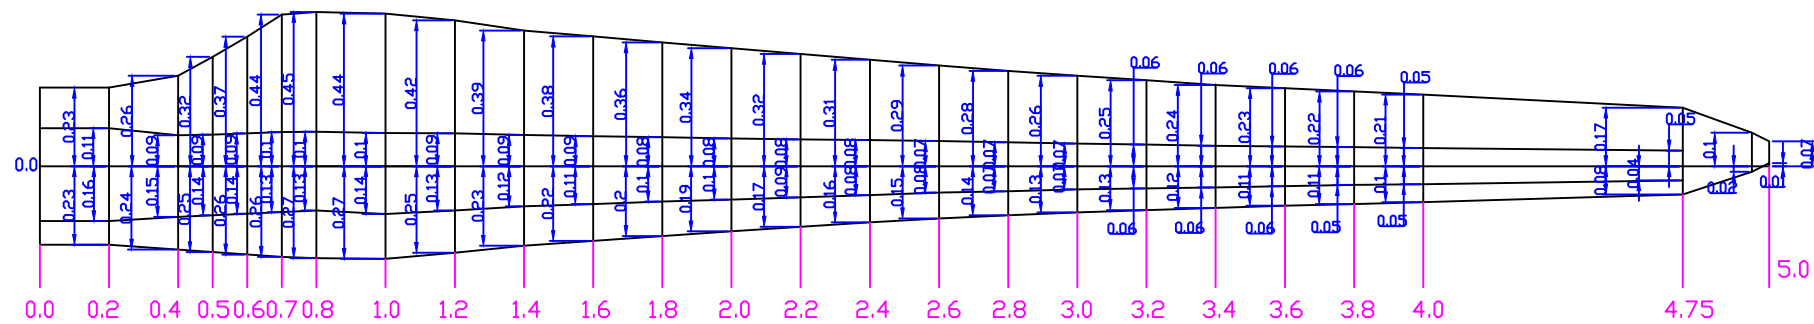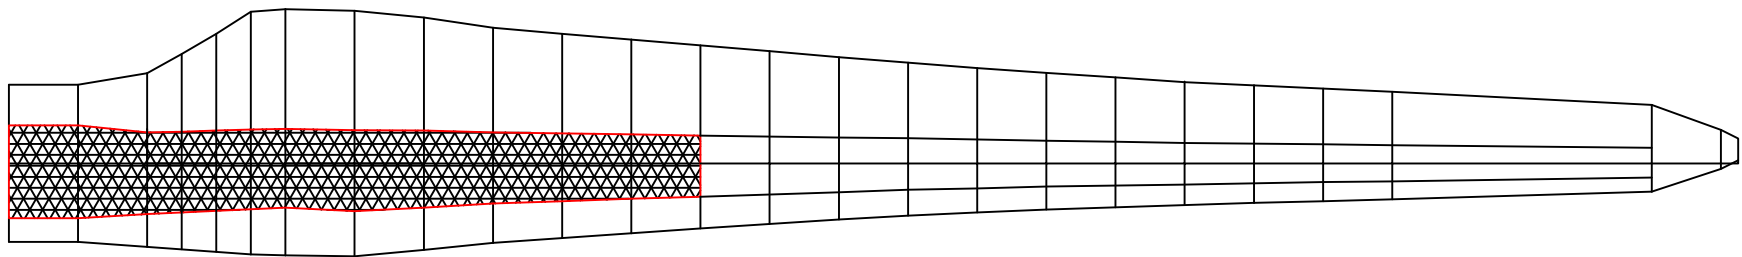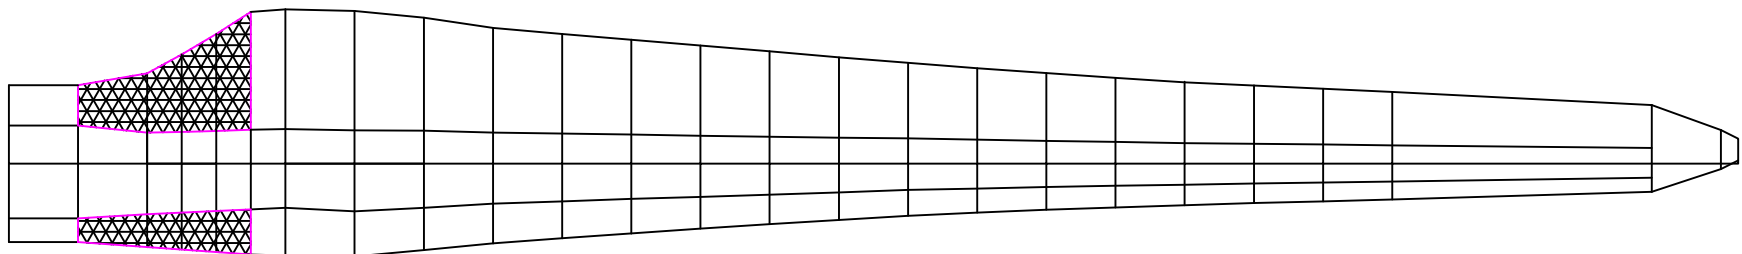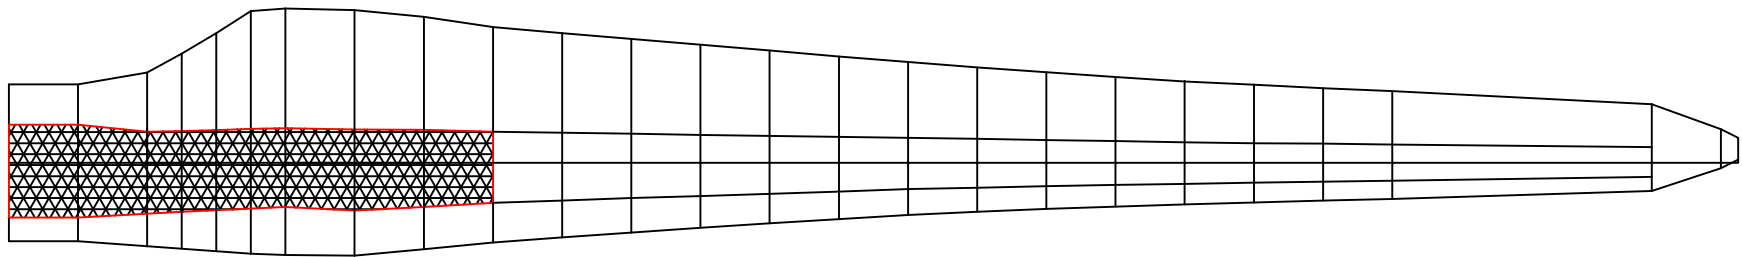

The pictures show the blade in flattened state  
Fabrication method : Wet hand Lay-up  
Mean Wf (fiber weight fraction) = 0.55

|                           |          |                                                  |                                             |                                                          |                       |               |
|---------------------------|----------|--------------------------------------------------|---------------------------------------------|----------------------------------------------------------|-----------------------|---------------|
| Itemref                   | Quantity | Title/Name, designation, material, dimension etc |                                             |                                                          | Article No./Reference |               |
| Designed by<br>CompBlades |          | Checked by<br>CompBlades                         | Approved by – date<br>CompBlades – 20/09/13 | File name                                                | Date<br>20/09/13      | Scale<br>1:20 |
| CompBlades.com            |          |                                                  |                                             | Blade – Suction side – Lamination plan – Layers 13/14/15 |                       |               |
|                           |          |                                                  |                                             | METU__B__S_layers__131415                                |                       | Edition<br>0  |
