# Supplementary material for: Finite element simulations for investigating the strength characteristics of a 5 m composite wind turbine blade
Source: Copernicus journal article supplement (doi:10.5194/wes-5-1339-2020), 2020-10-20
Supplement: Supplementary file 22 [file METU_B_S_layers_16-17-18.pdf › RUZGEM_Blade_Geometry_and_Layup/Suction side/METU_B_S_layers_16-17-18.pdf]

|       |               |      |           |         |
|-------|---------------|------|-----------|---------|
| RevNo | Revision note | Date | Signature | Checked |
|-------|---------------|------|-----------|---------|

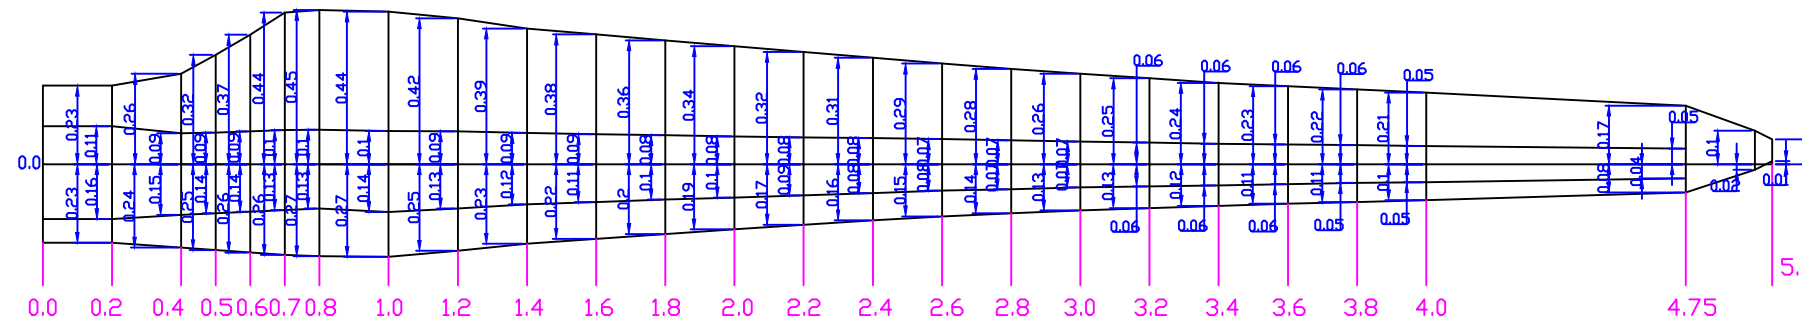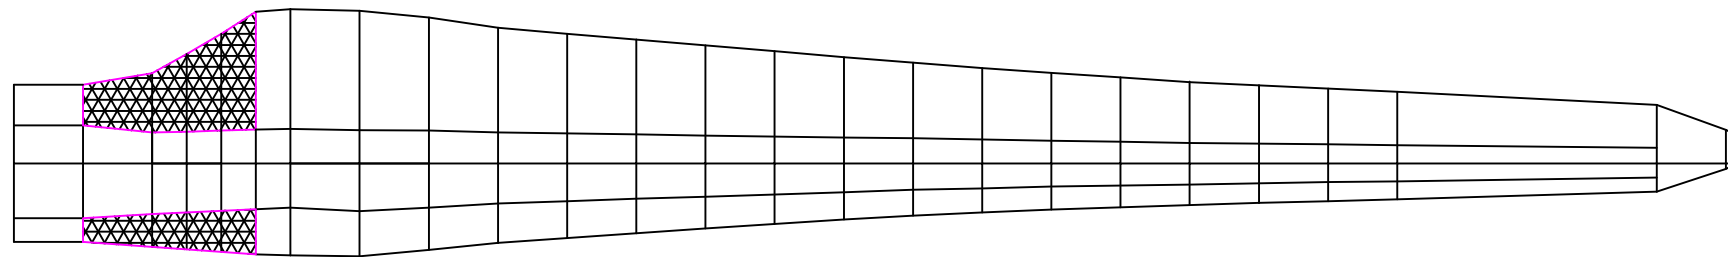

16.Triaxial ( $\pm 45/0$ ) E-Glass fabric: METYX XL800E10F-0/45 of 835g/m<sup>2</sup>  
Epoxy Resin: HUNSTMAN Araldite LY 3505/Hardener XB 3403  
Surface le area = 0,05m<sup>2</sup>, Surface te area = 0,1049m<sup>2</sup>

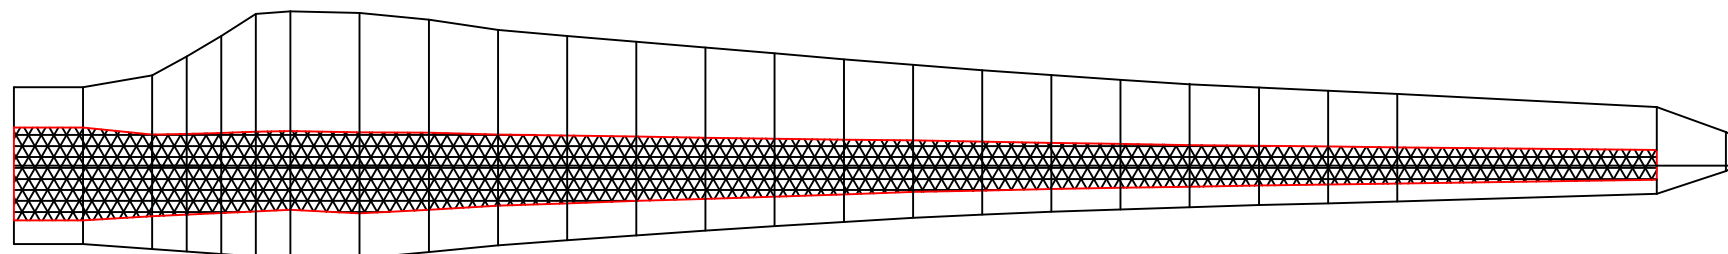

17.Unidirectional E-Glass fabric: METYX L600E10C-0 of 623g/m<sup>2</sup>  
Epoxy Resin: HUNSTMAN Araldite LY 3505/Hardener XB 3403  
Surface area = 0,79 m<sup>2</sup>

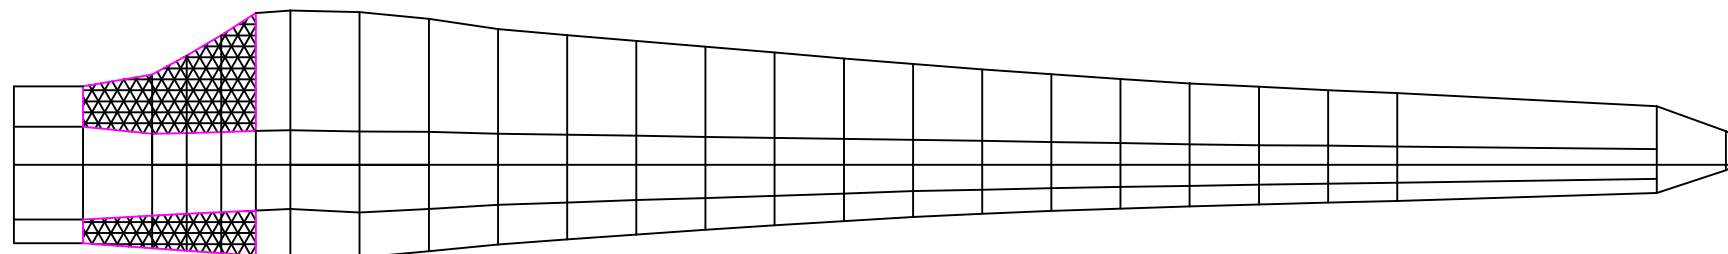

18.Triaxial ( $\pm 45/0$ ) E-Glass fabric: METYX XL800E10F-0/45 of 835g/m<sup>2</sup>  
Epoxy Resin: HUNSTMAN Araldite LY 3505/Hardener XB 3403  
Surface le area = 0,05m<sup>2</sup>, Surface te area = 0,1049m<sup>2</sup>

The pictures show the blade in flattened state  
Fabrication method : Wet hand Lay-up  
Mean Wf (fiber weight fraction) = 0.55

|                                                                                       |                          |                                                  |                                                          |                  |                       |              |
|---------------------------------------------------------------------------------------|--------------------------|--------------------------------------------------|----------------------------------------------------------|------------------|-----------------------|--------------|
| Itemref                                                                               | Quantity                 | Title/Name, designation, material, dimension etc |                                                          |                  | Article No./Reference |              |
| Designed by<br>CompBlades                                                             | Checked by<br>CompBlades | Approved by - date<br>CompBlades - 20/09/13      | File name                                                | Date<br>20/09/13 | Scale<br>1:20         |              |
|  |                          |                                                  | Blade - Suction side - Lamination plan - Layers 16/17/18 |                  |                       |              |
|                                                                                       |                          |                                                  | METU_B_S_layers_161718                                   |                  | Edition<br>0          | Sheet<br>1/1 |
