# Supplementary material for: Finite element simulations for investigating the strength characteristics of a 5 m composite wind turbine blade
Source: Copernicus journal article supplement (doi:10.5194/wes-5-1339-2020), 2020-10-20
Supplement: Supplementary file 23 [file METU_B_S_layers_19-20-21.pdf › RUZGEM_Blade_Geometry_and_Layup/Suction side/METU_B_S_layers_19-20-21.pdf]

| RevNo | Revision note | Date | Signature | Checked |
|-------|---------------|------|-----------|---------|
|-------|---------------|------|-----------|---------|

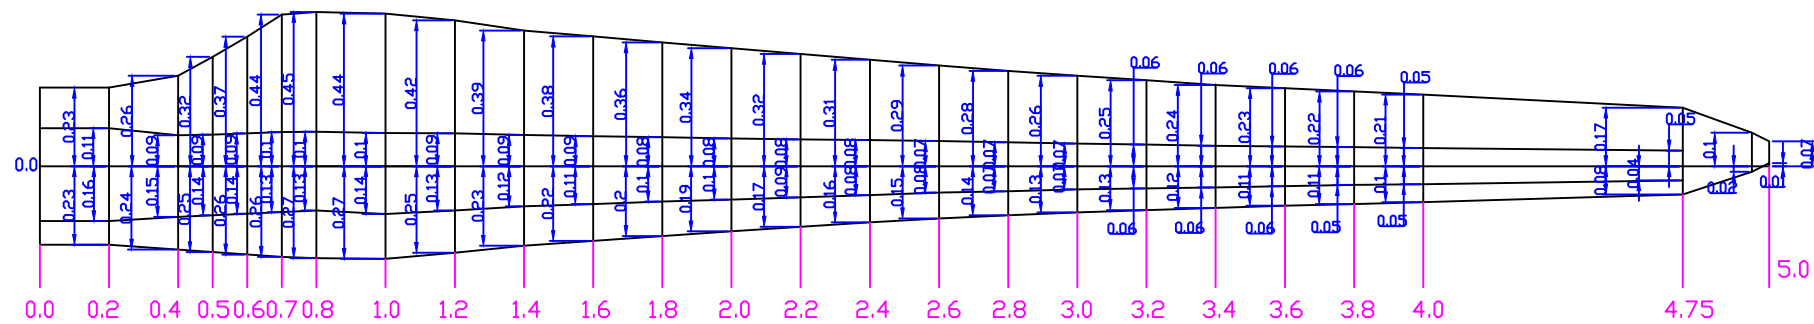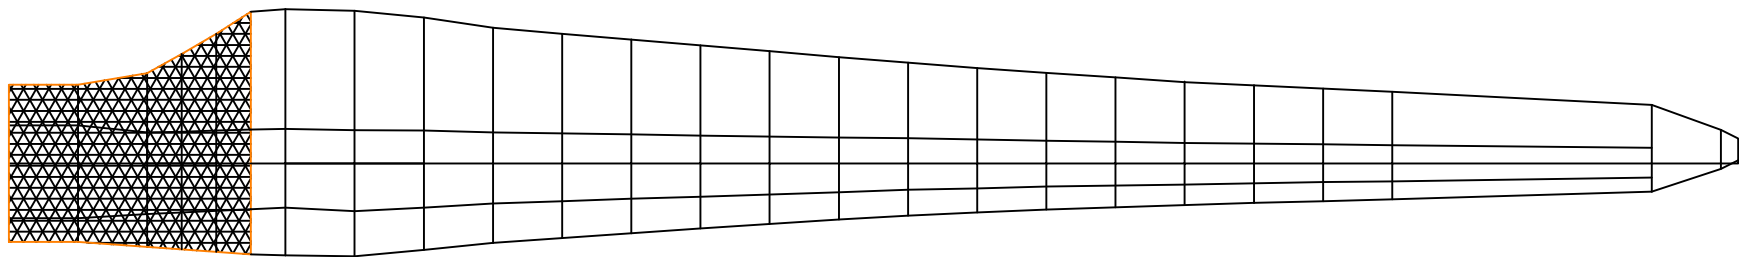

Triaxial ( $\pm 45/0$ ) E-Glass fabric: METYX XL800E10F-0/45 of 835g/m<sup>2</sup>  
Epoxy Resin: HUNSTMAN Araldite LY 3505/Hardener XB 3403  
Surface area = 0,366m<sup>2</sup>

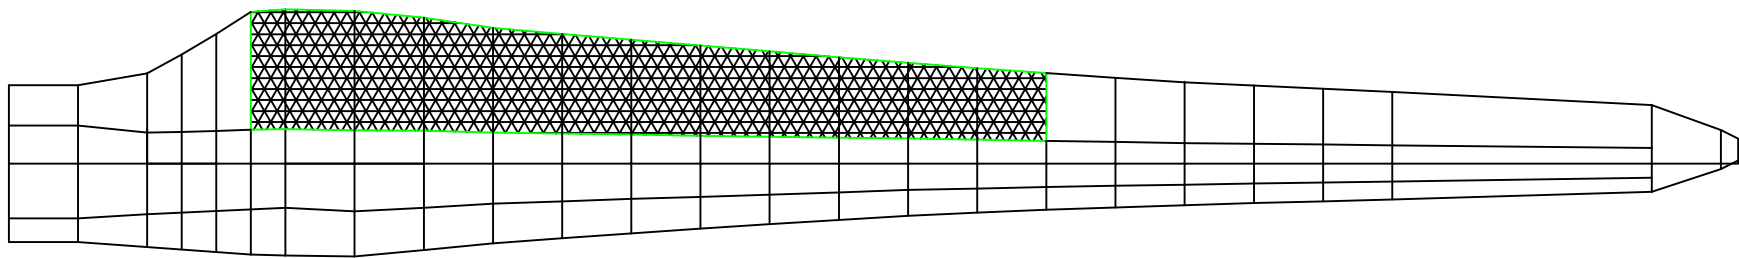

20.Foam thickness 10mm (0,7-2m): DIAB Divinycell H45  
Foam thickness 5mm (2-3m): DIAB Divinycell H45  
Epoxy Resin: HUNSTMAN Araldite LY 3505/Hardener XB 3403  
Surface area = 0,6287m<sup>2</sup>

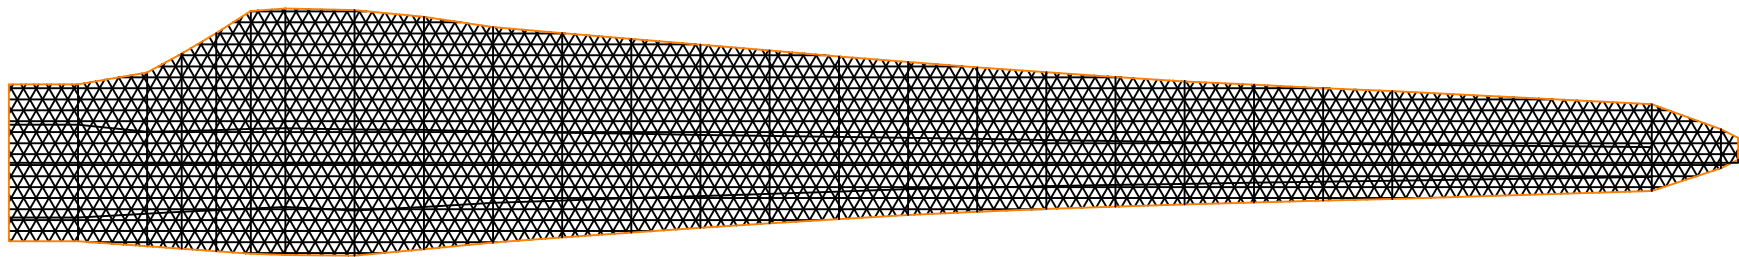

21.Triaxial ( $0/\pm 45$ ) E-Glass fabric: METYX XL800E10F-0/45 of 835g/m<sup>2</sup>  
Epoxy Resin: HUNSTMAN Araldite LY 3505/Hardener XB 3403  
Surface area = 2,2506m<sup>2</sup>

The pictures show the blade in flattened state  
Fabrication method : Wet hand Lay-up  
Mean Wf (fiber weight fraction) = 0.55

| Itemref                                                  | Quantity                 | Title/Name, designation, material, dimension etc |           | Article No./Reference  |               |
|----------------------------------------------------------|--------------------------|--------------------------------------------------|-----------|------------------------|---------------|
| Designed by<br>CompBlades                                | Checked by<br>CompBlades | Approved by - date<br>CompBlades - 20/09/13      | File name | Date<br>20/09/13       | Scale<br>1:20 |
| Blade - Suction side - Lamination plan - Layers 19/20/21 |                          |                                                  |           | METU_B_S_layers_192021 | Edition<br>0  |
|                                                          |                          |                                                  |           |                        | Sheet<br>1/1  |
