# Supplementary material for: Finite element simulations for investigating the strength characteristics of a 5 m composite wind turbine blade
Source: Copernicus journal article supplement (doi:10.5194/wes-5-1339-2020), 2020-10-20
Supplement: Supplementary file [file wes-5-1339-2020-supplement-title-page.pdf › wes-5-1339-2020-supplement-title-page.pdf]

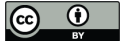

## *Supplement of*

# **Finite element simulations for investigating the strength characteristics of a 5 m composite wind turbine blade**

**Can Muyan and Demirkan Coker**

*Correspondence to:* Demirkan Coker ([coker@metu.edu.tr](mailto:coker@metu.edu.tr))

- wes-5-1339-2020-supplement-title-page.pdf
- RUZGEM\_Blade\_Geometry\_and\_Layup
  - CAD\_Blade\_Span and Twist.xlsx
  - Chassis
    - \* METU\_B\_C\_layers\_01-02-03.pdf
    - \* METU\_B\_C\_layers\_04-05-06.pdf
    - \* METU\_B\_C\_layers\_07-08-09.pdf
    - \* METU\_B\_C\_layers\_10-11-12.pdf
    - \* METU\_B\_C\_layers\_13-14-15.pdf
    - \* METU\_B\_C\_layers\_16-17-18.pdf
    - \* METU\_B\_C\_layers\_19.pdf
  - Internal flange
    - \* METU\_B\_IF\_layers\_01-02-03.pdf
  - Pressure side
    - \* METU\_B\_P\_layers\_01-02-03.pdf
    - \* METU\_B\_P\_layers\_04-05-06.pdf
    - \* METU\_B\_P\_layers\_07-08-09.pdf
    - \* METU\_B\_P\_layers\_10-11-12.pdf
    - \* METU\_B\_P\_layers\_13-14-15.pdf
    - \* METU\_B\_P\_layers\_16-17-18.pdf
    - \* METU\_B\_P\_layers\_19-20-21.pdf
  - Suction side
    - \* METU\_B\_S\_001.pdf
    - \* METU\_B\_S\_layers\_01-02-03.pdf
    - \* METU\_B\_S\_layers\_04-05-06.pdf
    - \* METU\_B\_S\_layers\_07-08-09.pdf

- \* METU\_B\_S\_layers\_10-11-12.pdf
- \* METU\_B\_S\_layers\_13-14-15.pdf
- \* METU\_B\_S\_layers\_16-17-18.pdf
- \* METU\_B\_S\_layers\_19-20-21.pdf

The copyright of individual parts of the supplement might differ from the CC BY 4.0 License.
