# Supplementary figures and images for: Finite element simulations for investigating the strength characteristics of a 5 m composite wind turbine blade
Source: Copernicus journal article supplement (doi:10.5194/wes-5-1339-2020), 2020-10-20

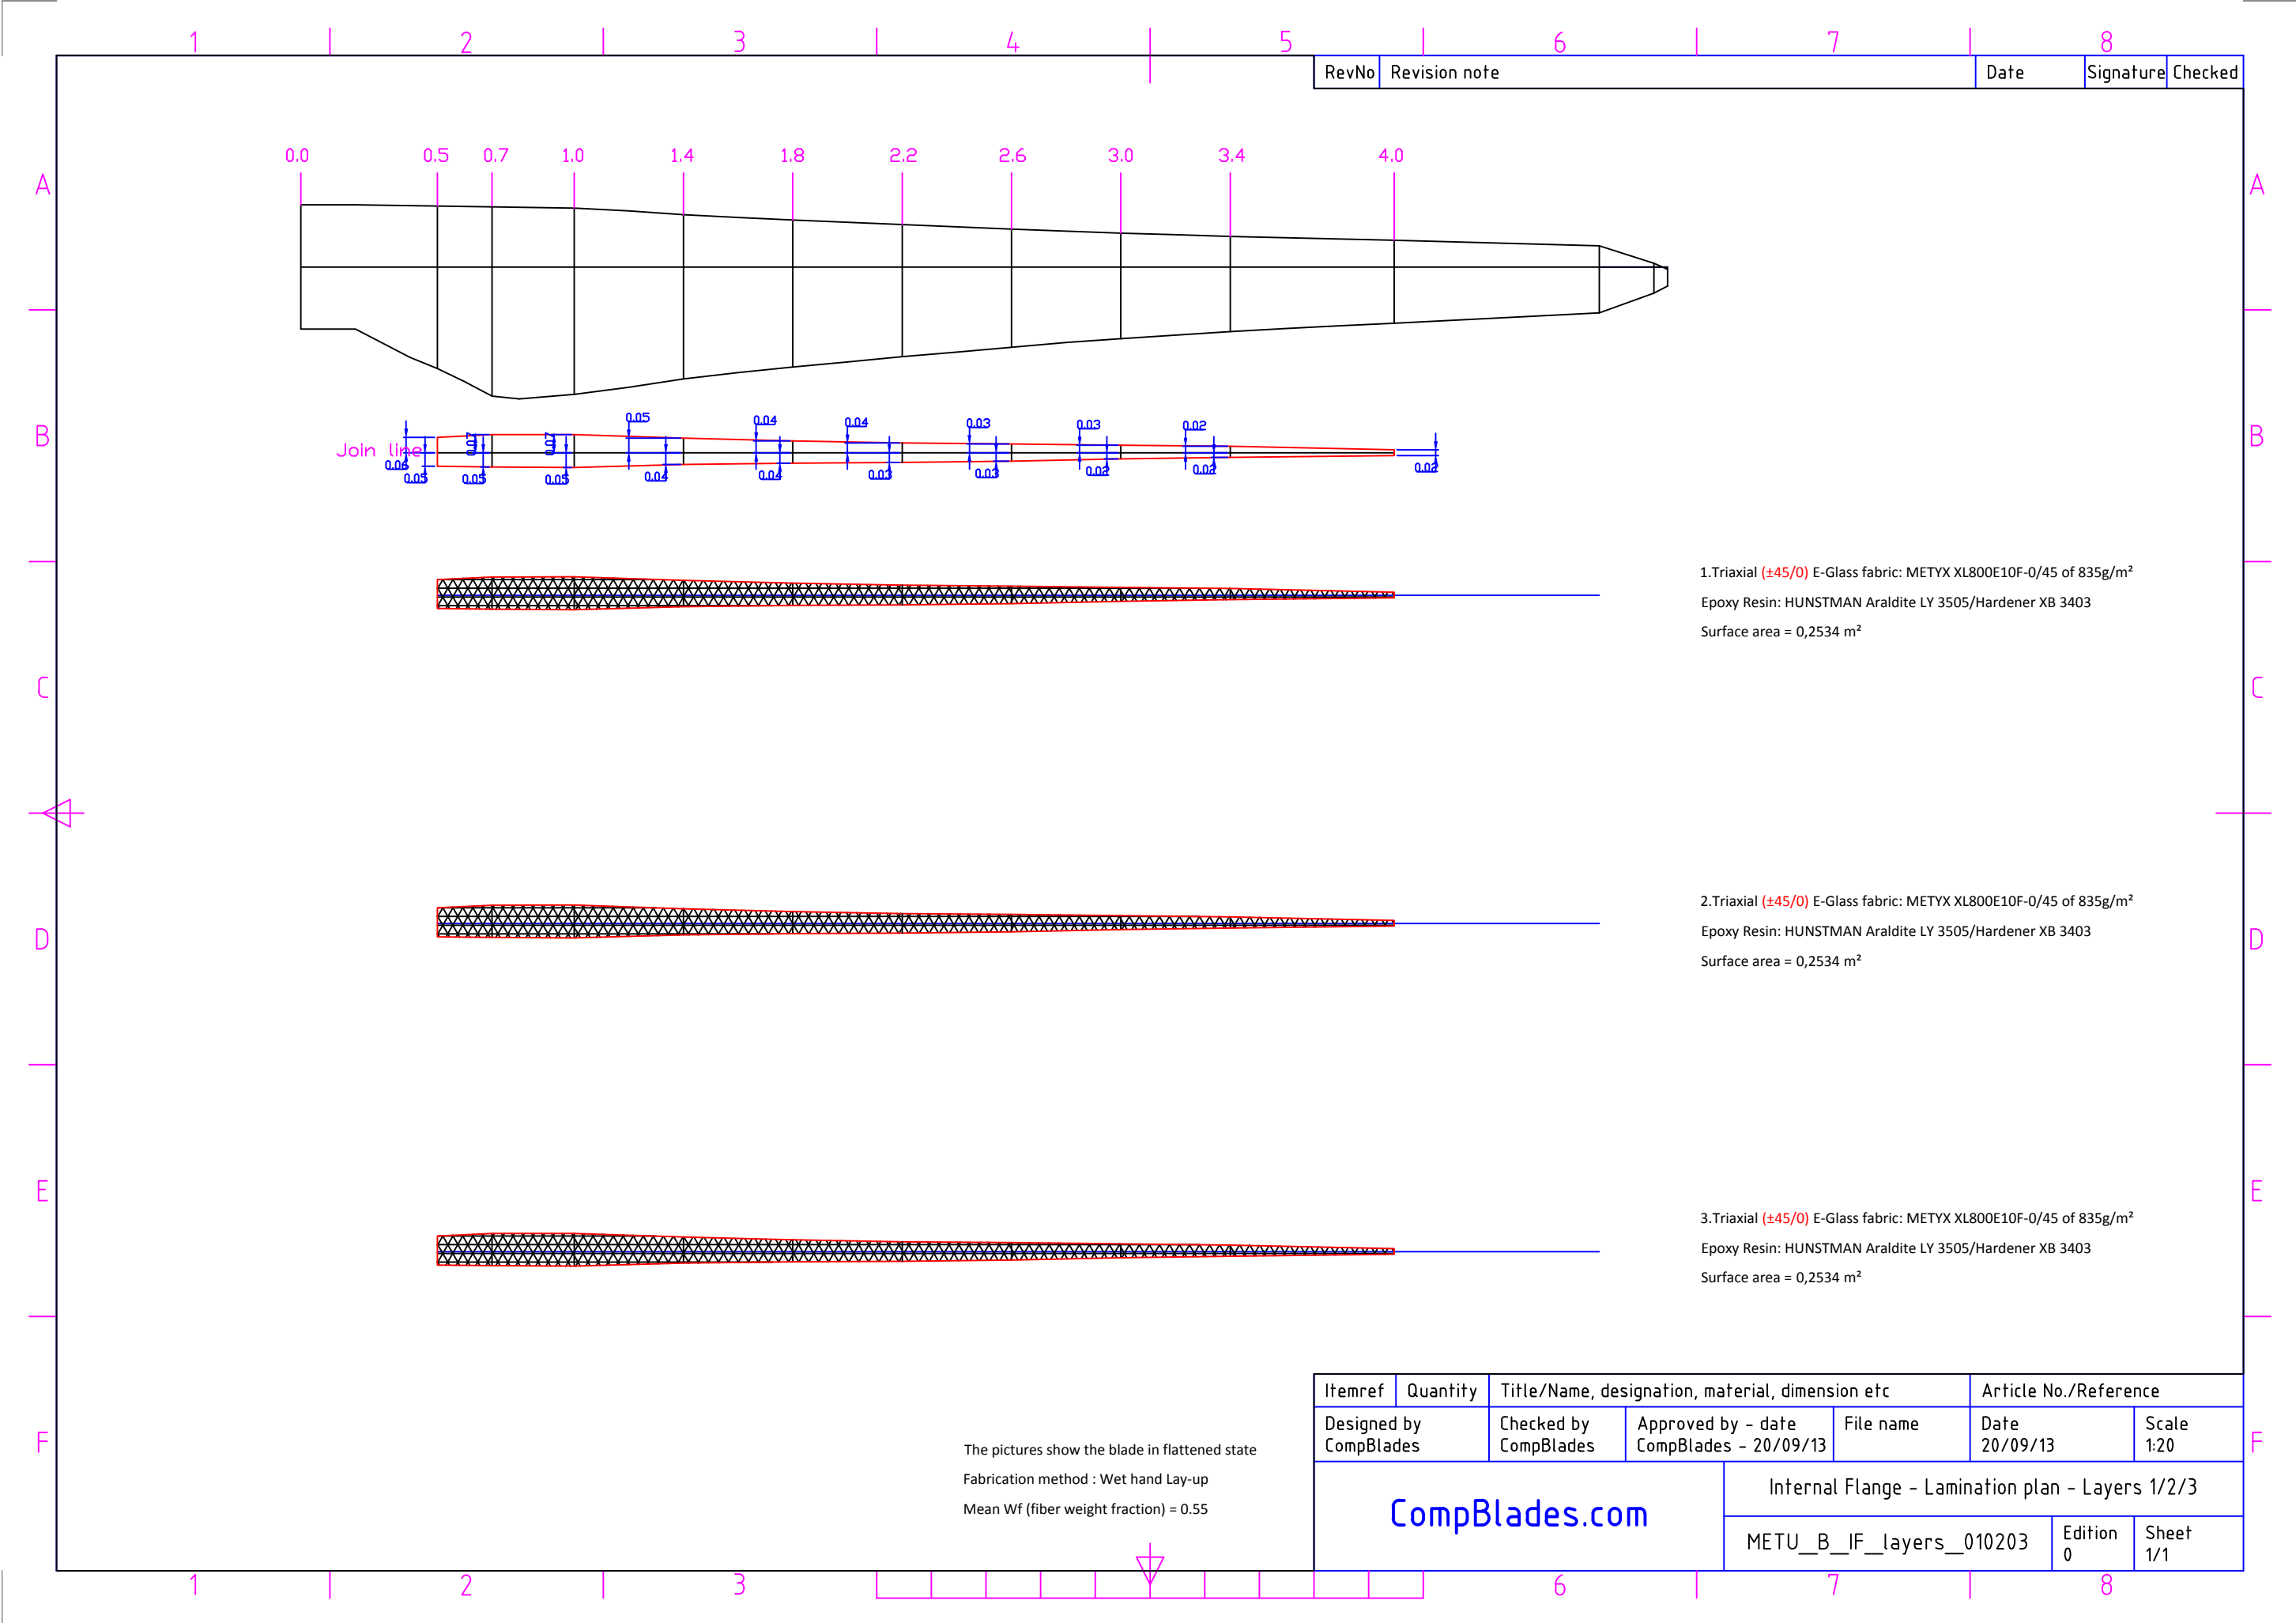

Supplement: Supplementary file 8 [file METU_B_IF_layers_01-02-03.pdf › RUZGEM_Blade_Geometry_and_Layup/Internal flange/METU_B_IF_layers_01-02-03.pdf]

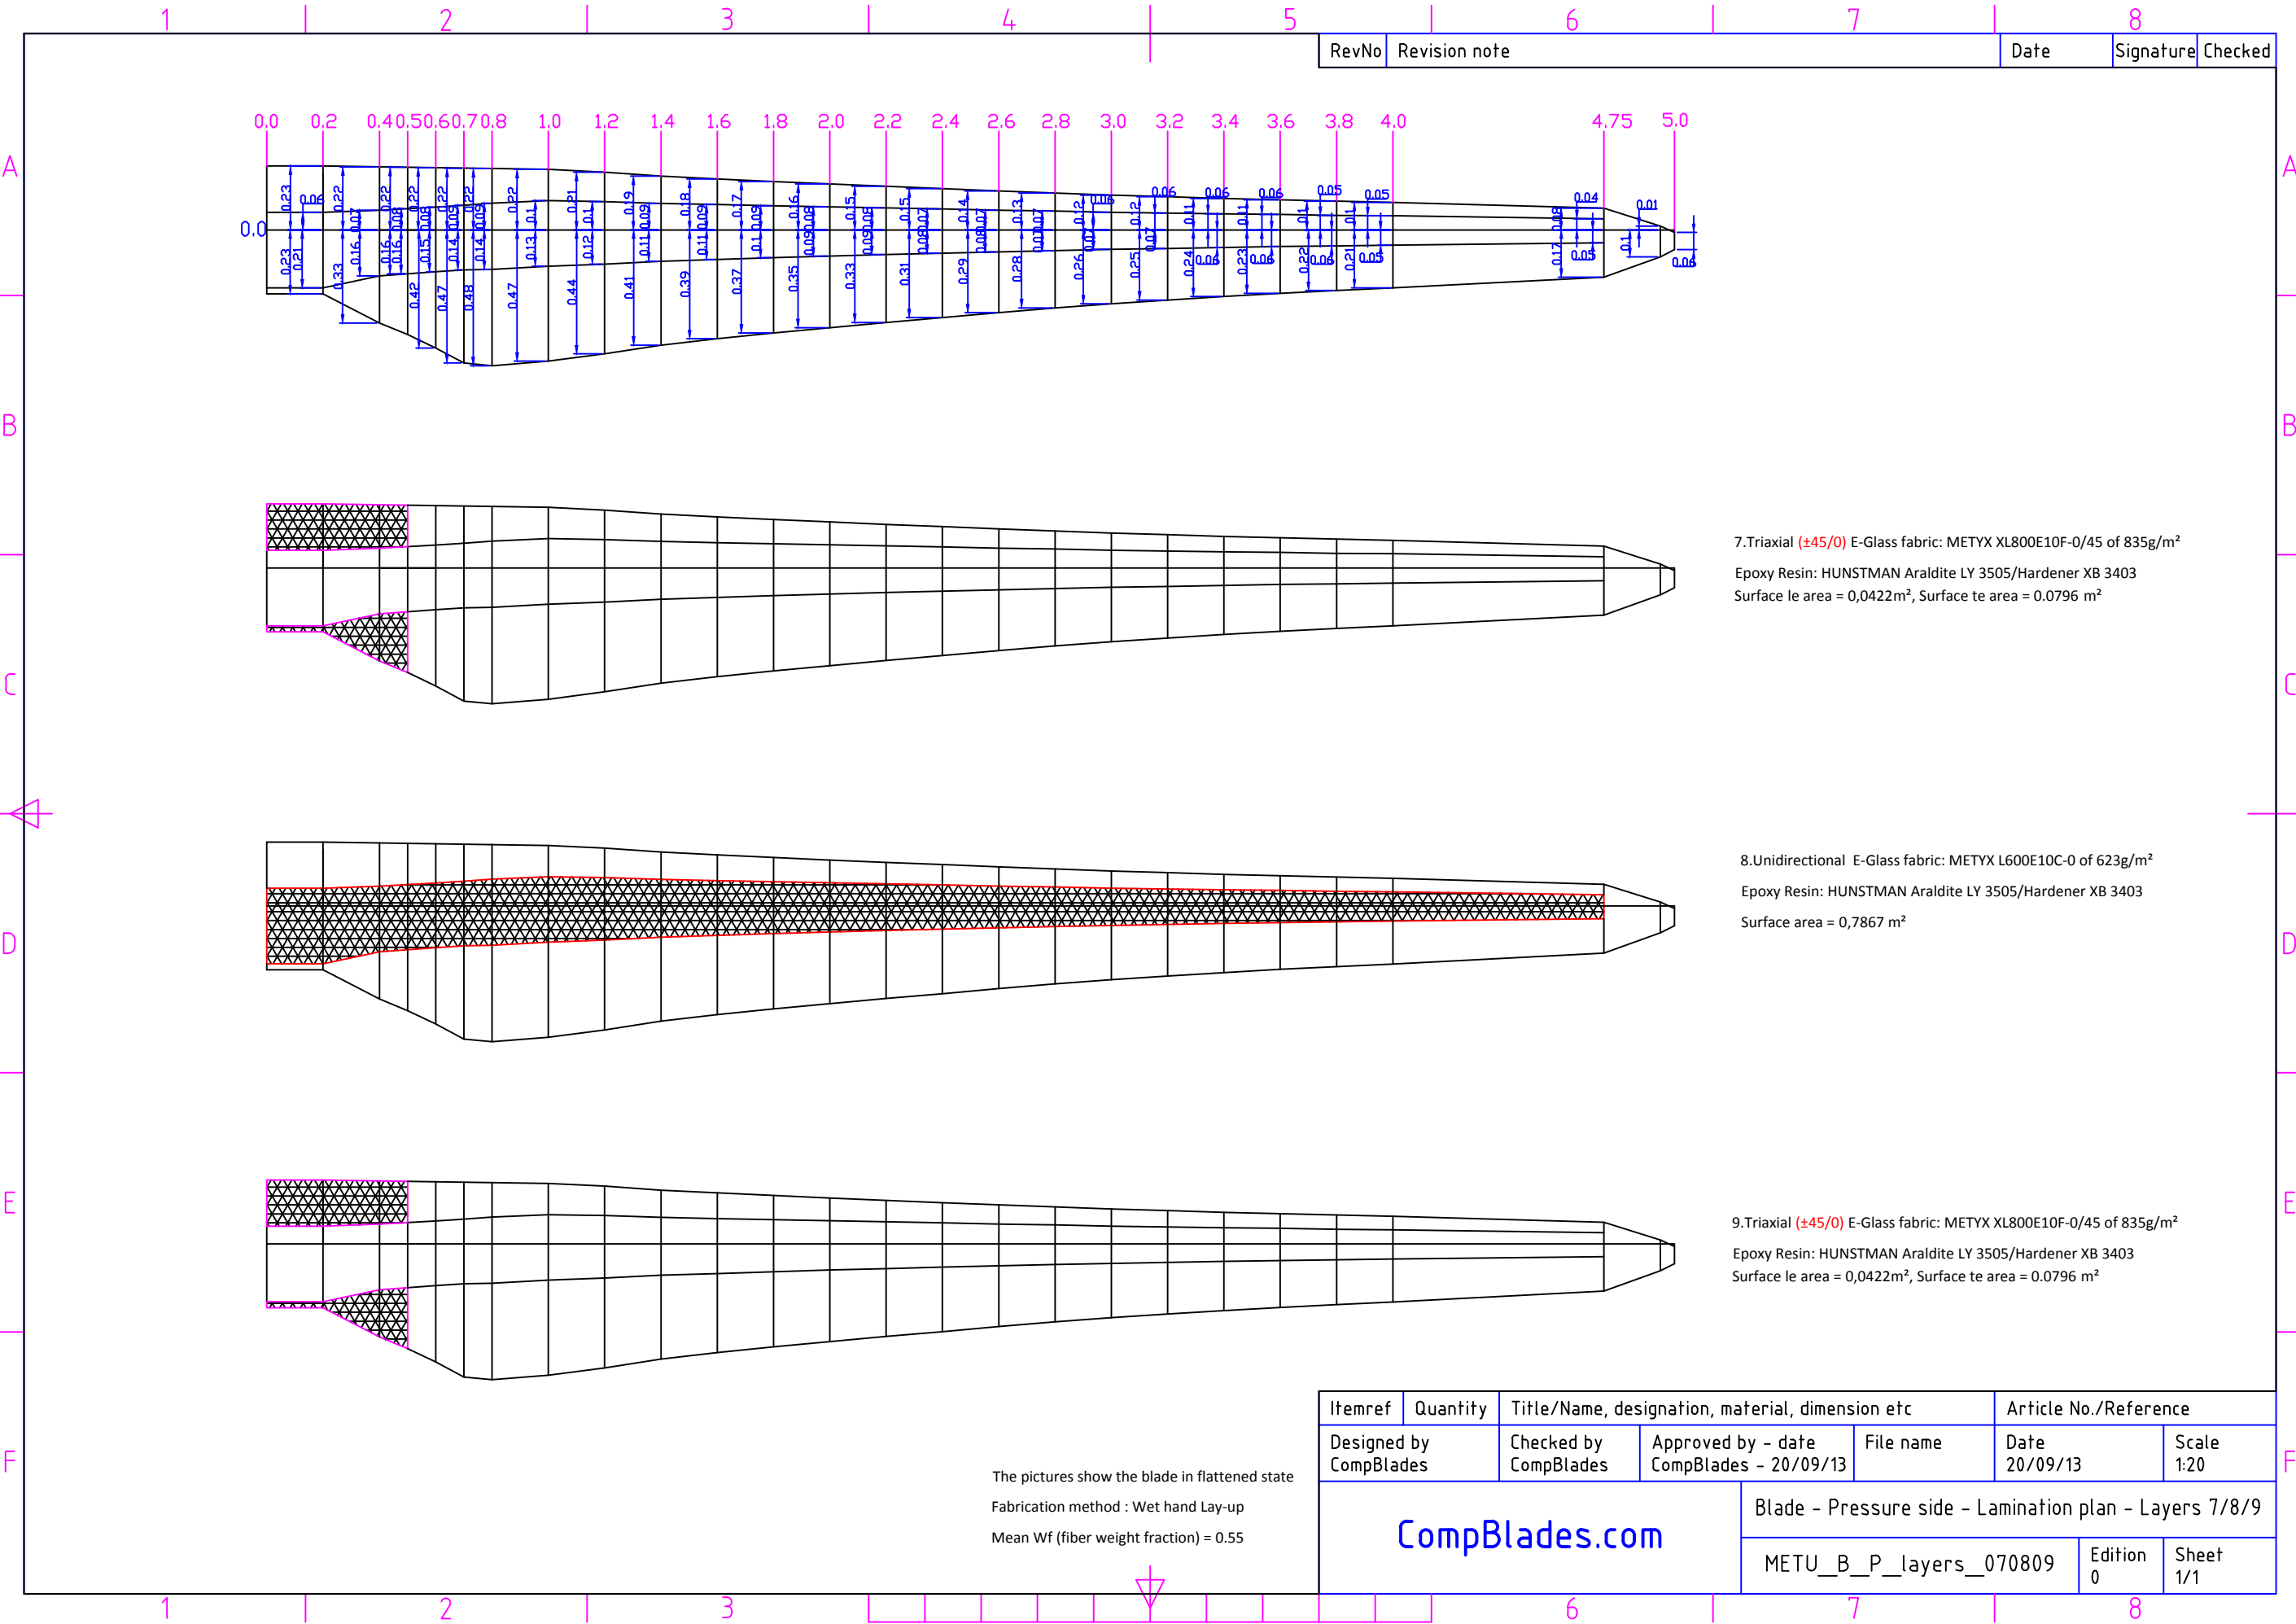

Supplement: Supplementary file 11 [file METU_B_P_layers_07-08-09.pdf › RUZGEM_Blade_Geometry_and_Layup/Pressure side/METU_B_P_layers_07-08-09.pdf]

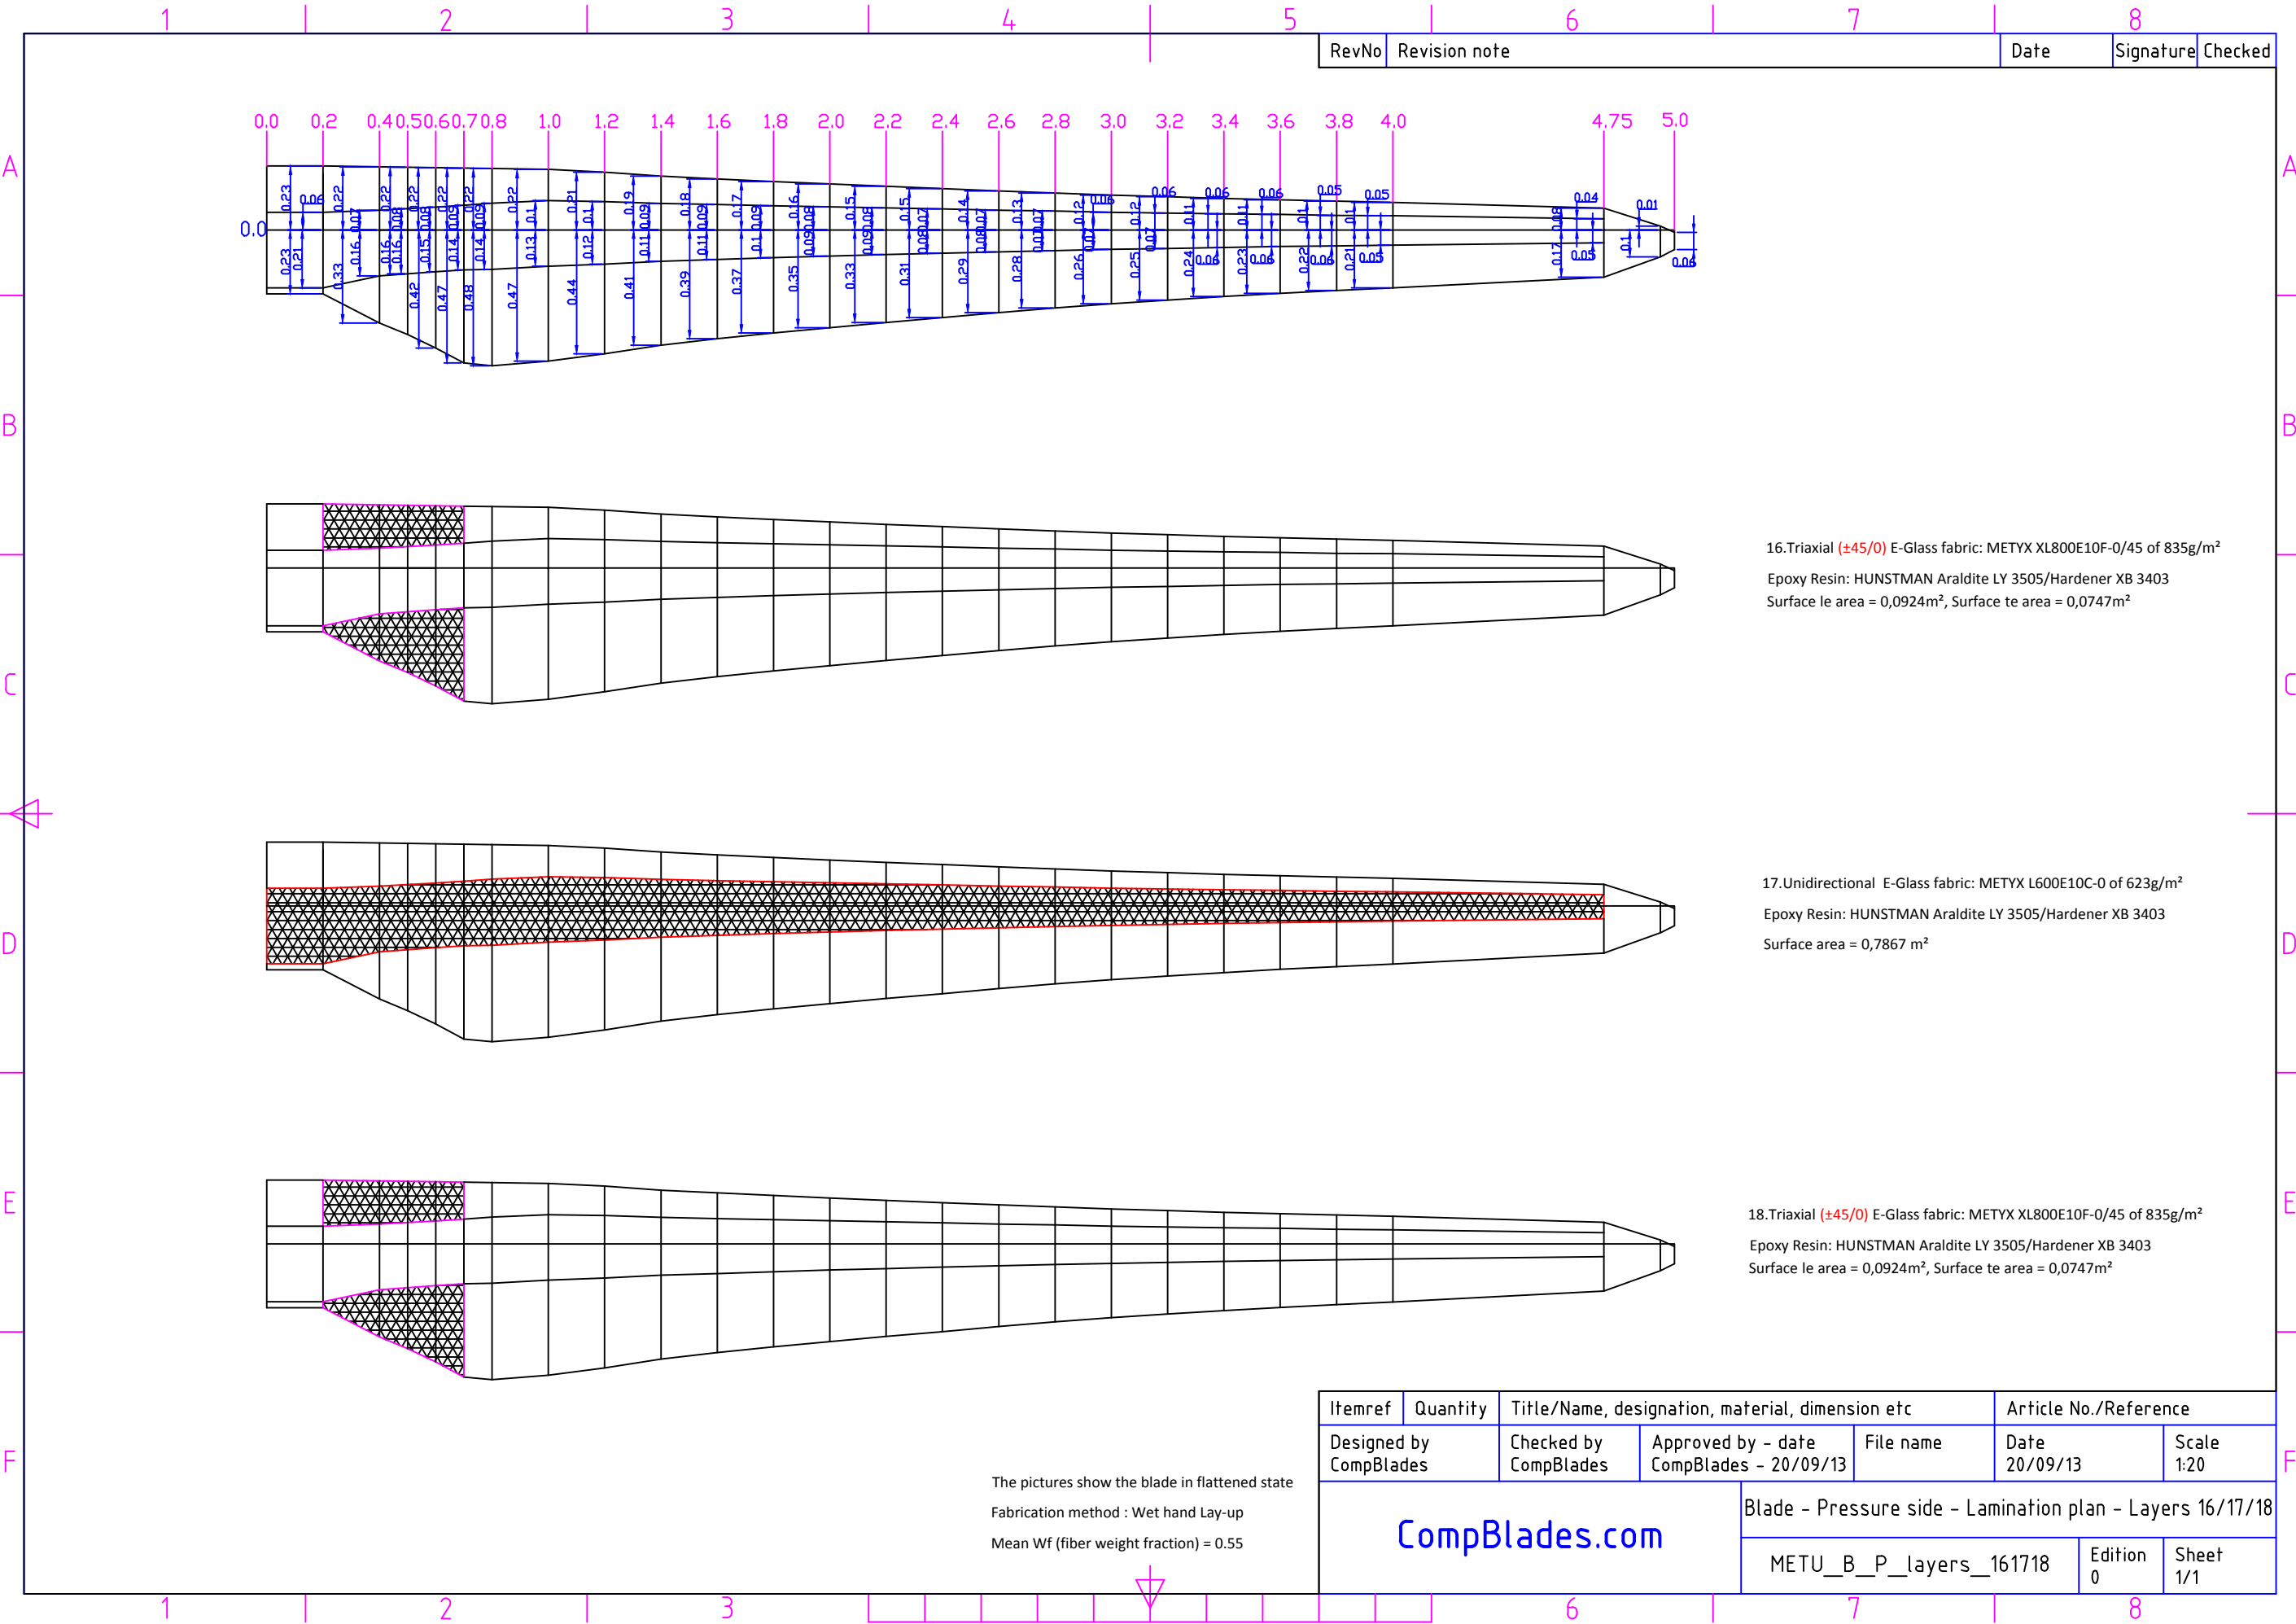

Supplement: Supplementary file 14 [file METU_B_P_layers_16-17-18.pdf › RUZGEM_Blade_Geometry_and_Layup/Pressure side/METU_B_P_layers_16-17-18.pdf]

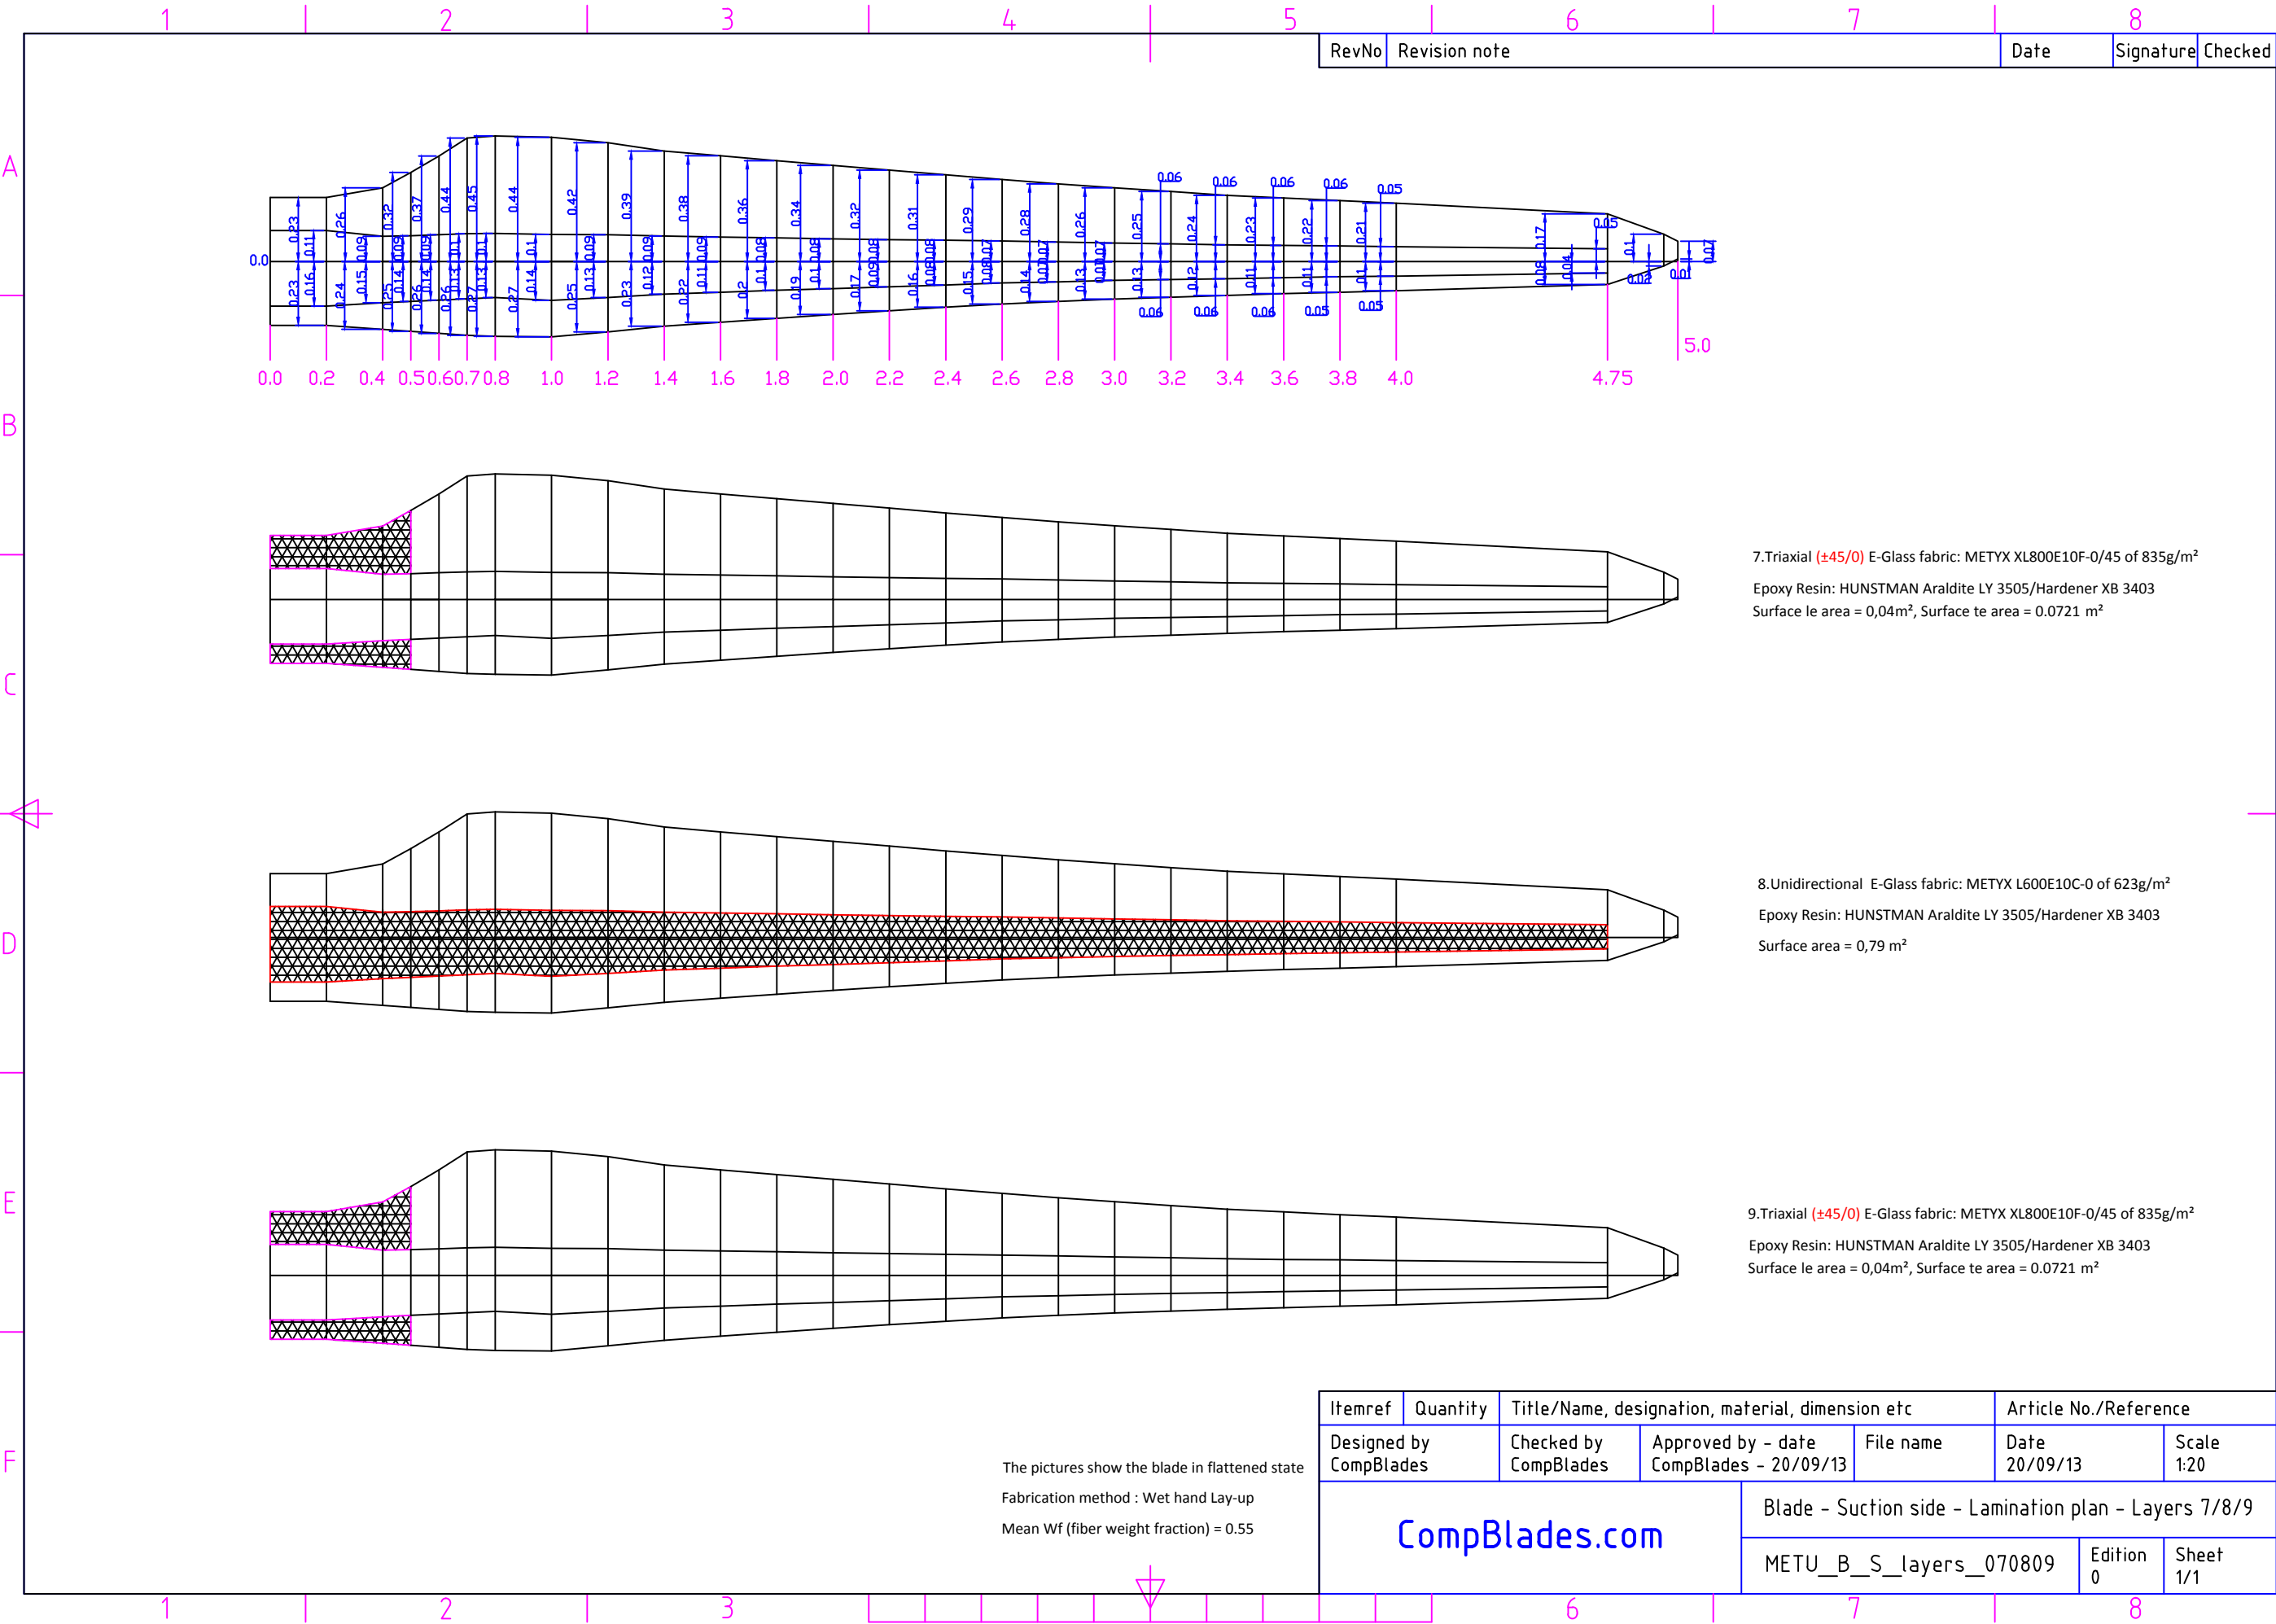

Supplement: Supplementary file 19 [file METU_B_S_layers_07-08-09.pdf › RUZGEM_Blade_Geometry_and_Layup/Suction side/METU_B_S_layers_07-08-09.pdf]
